# Supplementary material
Source: Royal Society of Chemistry journal article supplement (doi:10.1039/d5ta09764a)
Supplement: d5ta09764a1.pdf [file d5ta09764a1.pdf]

## Supporting Information

### **Electrochemical reduction conditioning modified Fe-based catalysts with structural disorders for efficient ammonium production from nitrite reduction**

Maggie Lim,<sup>a</sup> Zhipeng Ma,<sup>a</sup> Denny Gunawan,<sup>a</sup> Ying Ying Ch'ng,<sup>a</sup> Wenyu Zhong,<sup>a</sup> Putri Ramadhany,<sup>a</sup> Karan Menon,<sup>a</sup> Daqian Ruan,<sup>a</sup> Priyank Kumar,<sup>a</sup> Ali R. Jalili,<sup>b</sup> Rose Amal,<sup>a</sup> Rahman Daiyan,<sup>\*c</sup> Emma C Lovell<sup>\*a</sup>

<sup>a</sup> Particles and Catalysis Research Laboratories and School of Chemical Engineering, UNSW Sydney, Sydney, NSW 2052, Australia

<sup>b</sup> School of Chemistry, UNSW Sydney, Sydney, NSW 2052, Australia

<sup>c</sup> Particles and Catalysis Research Laboratories and School of Minerals and Energy Resources Engineering, UNSW Sydney, Sydney, NSW 2052, Australia

\* Corresponding authors

[e.lovell@unsw.edu.au](mailto:e.lovell@unsw.edu.au)

[r.daiyan@unsw.edu.au](mailto:r.daiyan@unsw.edu.au)

## Supporting Figures

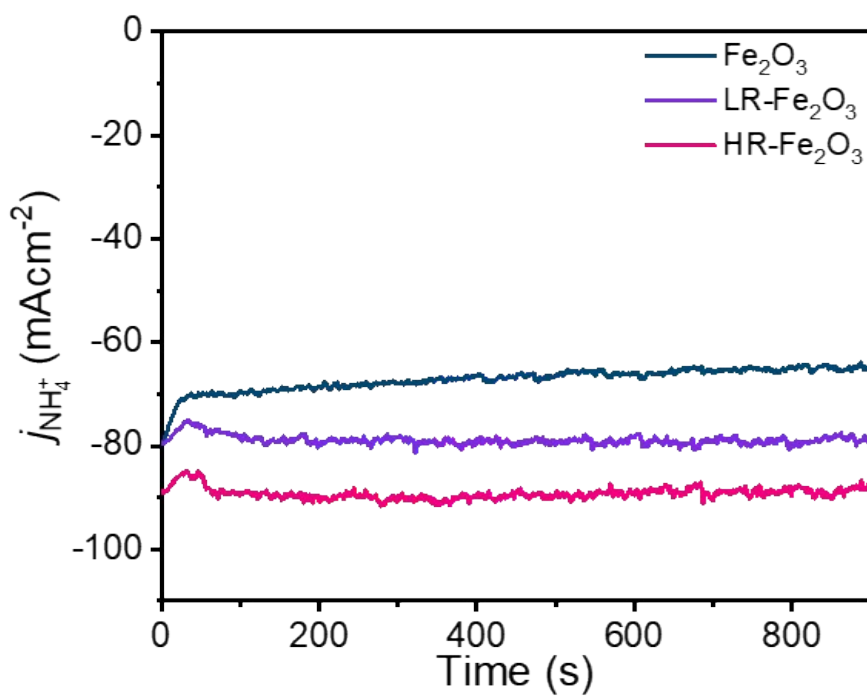

**Figure S1.** Chronoamperometric  $i-t$  curves of Fe<sub>2</sub>O<sub>3</sub>, LR-Fe<sub>2</sub>O<sub>3</sub>, and HR-Fe<sub>2</sub>O<sub>3</sub> electrodes at NO<sub>2</sub>RR applied potential of -1.0 V vs RHE. HR-Fe<sub>2</sub>O<sub>3</sub> maintains the highest partial current density for NH<sub>4</sub><sup>+</sup> production of  $\sim 90.3$  mA cm<sup>-2</sup> among all samples at NO<sub>2</sub>RR applied potential of -1.0 V vs RHE, followed by LR-Fe<sub>2</sub>O<sub>3</sub> ( $\sim 80$  mA cm<sup>-2</sup>), and lastly, pristine Fe<sub>2</sub>O<sub>3</sub> ( $\sim 66$  mA cm<sup>-2</sup>).

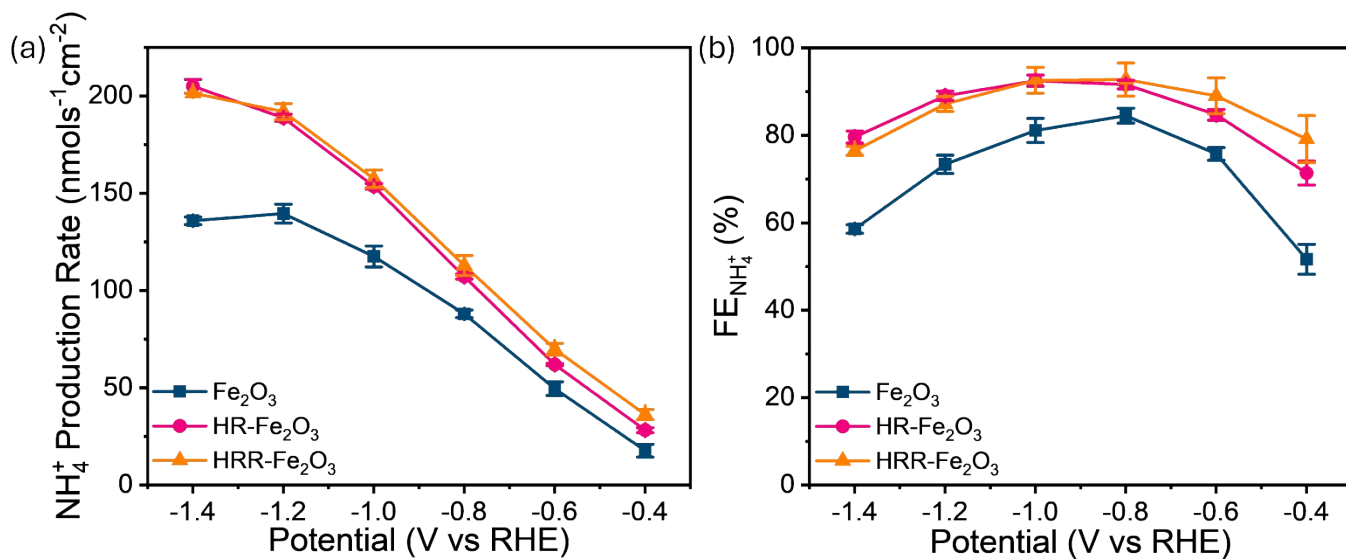

**Figure S2.** NO<sub>2</sub>RR-to-NH<sub>4</sub><sup>+</sup> production performances of Fe<sub>2</sub>O<sub>3</sub>, HR-Fe<sub>2</sub>O<sub>3</sub>, and HRR-Fe<sub>2</sub>O<sub>3</sub> electrodes across an applied potential range of -1.4 to -0.4 V vs RHE: **(a)** NH<sub>4</sub><sup>+</sup> production rate and **(b)** Faradaic efficiency (FE<sub>NH<sub>4</sub><sup>+</sup></sub>). The HRR-Fe<sub>2</sub>O<sub>3</sub> catalyst exhibits essentially identical performance to the HR-Fe<sub>2</sub>O<sub>3</sub> electrode, showing overlapping trends in both NH<sub>4</sub><sup>+</sup> production rate and FE<sub>NH<sub>4</sub><sup>+</sup></sub> across the applied potentials from -0.4 to 1.4 V vs RHE, with only minor differences within experimental error.

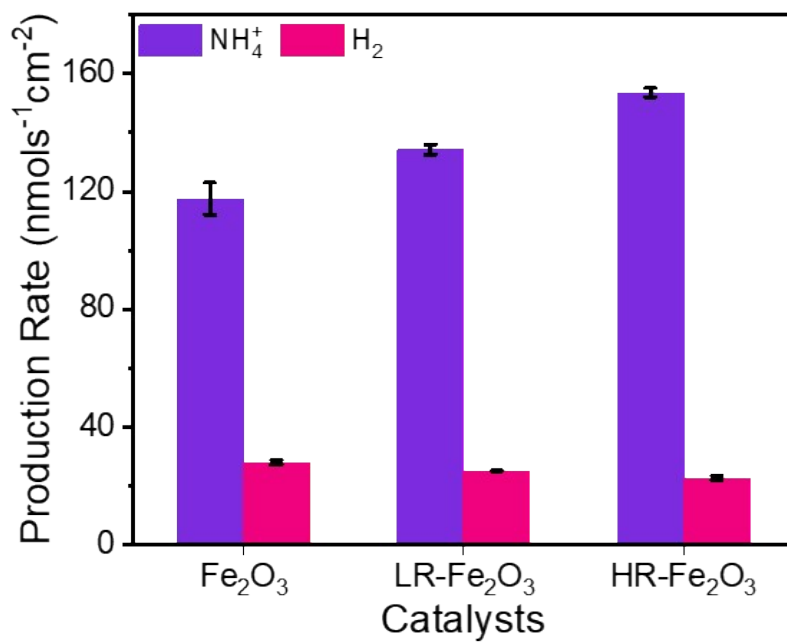

**Figure S3.** Comparison of  $\text{NH}_4^+$  and  $\text{H}_2$  production rates of  $\text{Fe}_2\text{O}_3$ , LR- $\text{Fe}_2\text{O}_3$ , and HR- $\text{Fe}_2\text{O}_3$  electrodes at  $\text{NO}_2\text{RR}$  applied potential of  $-1.0\text{ V}$  vs RHE. HR- $\text{Fe}_2\text{O}_3$  generates the least amount of  $\text{H}_2$  ( $22\text{ nmol s}^{-1}\text{ cm}^{-2}$ ), followed by LR- $\text{Fe}_2\text{O}_3$  ( $25\text{ nmol s}^{-1}\text{ cm}^{-2}$ ), with pristine  $\text{Fe}_2\text{O}_3$  producing the most ( $28\text{ nmol s}^{-1}\text{ cm}^{-2}$ ).

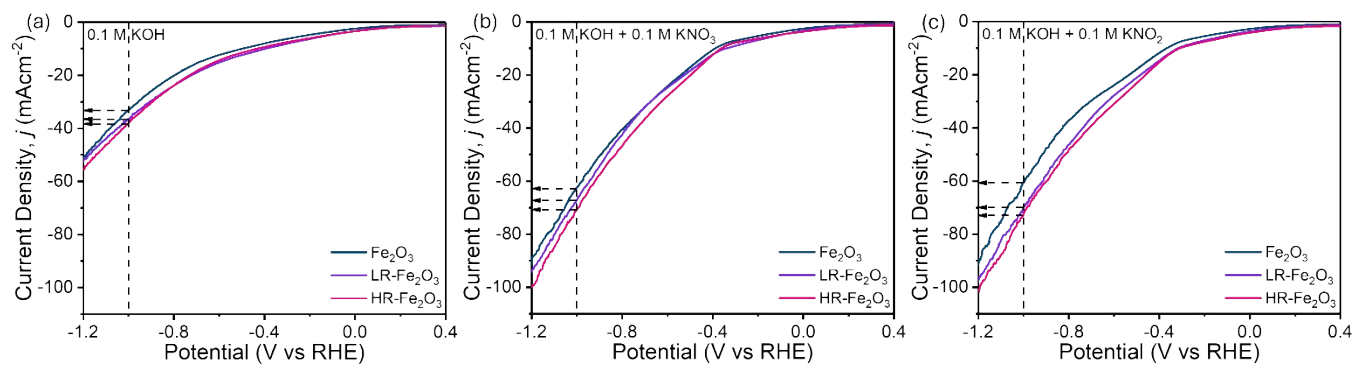

**Figure S4.** Polarization curves of Fe<sub>2</sub>O<sub>3</sub>, LR-Fe<sub>2</sub>O<sub>3</sub>, and HR-Fe<sub>2</sub>O<sub>3</sub> electrodes at scan rate of 5 mV s<sup>-1</sup> in electrolyte condition of **(a)** 0.1 M KOH, **(b)** 0.1 M KOH + 0.1 M KNO<sub>3</sub>, and **(c)** 0.1 M KOH + 0.1 M KNO<sub>2</sub>. These polarization curves indicate that both LR-Fe<sub>2</sub>O<sub>3</sub> and HR-Fe<sub>2</sub>O<sub>3</sub> exhibit slight improvements in total current densities ( $j$ ) compared to pristine Fe<sub>2</sub>O<sub>3</sub> across tested potentials in all types of electrolytes. For instance, at -1.0 V vs RHE in 0.1 M KOH + 0.1 M KNO<sub>2</sub> electrolyte, the  $j$  achieved by pristine Fe<sub>2</sub>O<sub>3</sub> is -60.1 mA cm<sup>-2</sup>, while LR-Fe<sub>2</sub>O<sub>3</sub> and HR-Fe<sub>2</sub>O<sub>3</sub> show improvements of ~ 16% (-69.9 mA cm<sup>-2</sup>) and ~ 22% (-73.0 mA cm<sup>-2</sup>), respectively. Similarly, in the electrolytes of 0.1 M KOH only and 0.1 M KOH + 0.1 M KNO<sub>3</sub>, at -1.0 V vs RHE, HR-Fe<sub>2</sub>O<sub>3</sub> achieves the highest  $j$  of ~ -38.2 and -70.7 mA cm<sup>-2</sup>, representing improvements of ~ 15% and 13% over pristine Fe<sub>2</sub>O<sub>3</sub> (-33.1 and -62.8 mA cm<sup>-2</sup>, respectively). LR-Fe<sub>2</sub>O<sub>3</sub> shows modest improvements of ~ 10% (~ -36.4 mA cm<sup>-2</sup>) and ~ 6.8% (-67.1 mA cm<sup>-2</sup>) in the same electrolytes. These results suggest that post-conditioned Fe<sub>2</sub>O<sub>3</sub> catalysts exhibit slightly enhanced intrinsic activity overall.

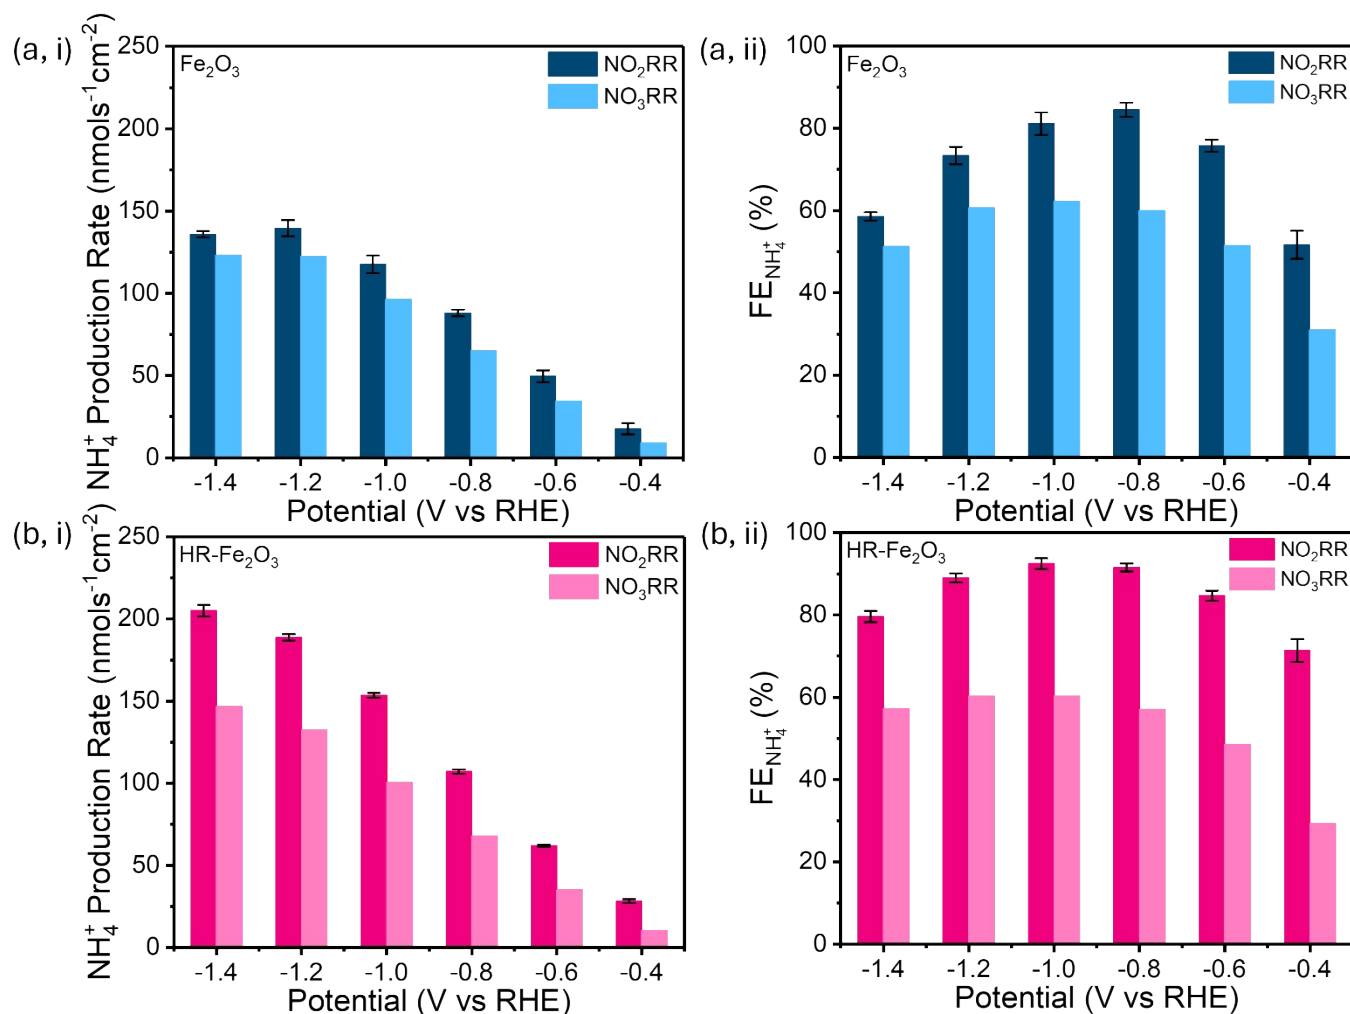

**Figure S5.** Performance comparison between NO<sub>2</sub>RR and NO<sub>3</sub>RR activity of (a) pristine Fe<sub>2</sub>O<sub>3</sub> and (b) HR-Fe<sub>2</sub>O<sub>3</sub> electrodes across an applied potential range of -1.4 to -0.4 V vs RHE: (i) NH<sub>4</sub><sup>+</sup> production rate and (ii) Faradaic efficiency (FE<sub>NH<sub>4</sub><sup>+</sup></sub>). The results clearly demonstrate that both electrodes produce greater NH<sub>4</sub><sup>+</sup> and FE<sub>NH<sub>4</sub><sup>+</sup></sub> in NO<sub>2</sub>RR than in NO<sub>3</sub>RR, with HR-Fe<sub>2</sub>O<sub>3</sub> consistently outperforming pristine Fe<sub>2</sub>O<sub>3</sub> in both reactions. Specifically, for NO<sub>2</sub>RR, HR-Fe<sub>2</sub>O<sub>3</sub> achieves a peak FE<sub>NH<sub>4</sub><sup>+</sup></sub> of 93% at -1.0 V vs RHE, with an NH<sub>4</sub><sup>+</sup> production rate of ~ 154 nmol s<sup>-1</sup> cm<sup>-2</sup>. This represents a 31% improvement in productivity and 15% increase in FE<sub>NH<sub>4</sub><sup>+</sup></sub> compared to pristine Fe<sub>2</sub>O<sub>3</sub> (~ 118 nmol s<sup>-1</sup> cm<sup>-2</sup> and 81% at -1.0 V vs RHE). For NO<sub>3</sub>RR, HR-Fe<sub>2</sub>O<sub>3</sub> also outperforms pristine Fe<sub>2</sub>O<sub>3</sub>, achieving an NH<sub>4</sub><sup>+</sup> production rate of ~101 nmol s<sup>-1</sup> cm<sup>-2</sup> at -1.0 V vs RHE, corresponding to a 5% improvement over pristine Fe<sub>2</sub>O<sub>3</sub> (~ 96 nmol s<sup>-1</sup> cm<sup>-2</sup>). However, for FE<sub>NH<sub>4</sub><sup>+</sup></sub> in NO<sub>3</sub>RR, both pristine Fe<sub>2</sub>O<sub>3</sub> and HR-Fe<sub>2</sub>O<sub>3</sub> exhibit nearly identical performance across the applied potentials. For example, at -1.0 V vs RHE, HR-Fe<sub>2</sub>O<sub>3</sub> achieves a FE<sub>NH<sub>4</sub><sup>+</sup></sub> of 61%, while pristine Fe<sub>2</sub>O<sub>3</sub> achieves 62%. Importantly, the results indicate that the improvements in NH<sub>4</sub><sup>+</sup> production are more pronounced in NO<sub>2</sub>RR than in NO<sub>3</sub>RR following the electroreduction conditioning (ERC) treatment. This suggests that the ERC-treated Fe<sub>2</sub>O<sub>3</sub> catalysts are more surface-active for NO<sub>2</sub>RR than NO<sub>3</sub>RR, and that ERC treatment yields better performance enhancements in NO<sub>2</sub>RR.

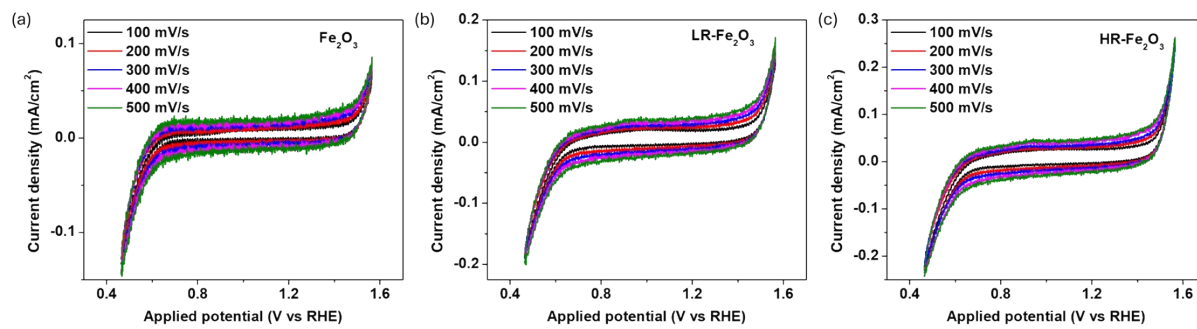

**Figure S6.** The cyclic voltammetry (CV) curves of  $\text{Fe}_2\text{O}_3$ , LR- $\text{Fe}_2\text{O}_3$ , and HR- $\text{Fe}_2\text{O}_3$  electrodes collected under different scan rates of 100, 200, 300, 400, and 500 mV/s were used for ECSA calculations.

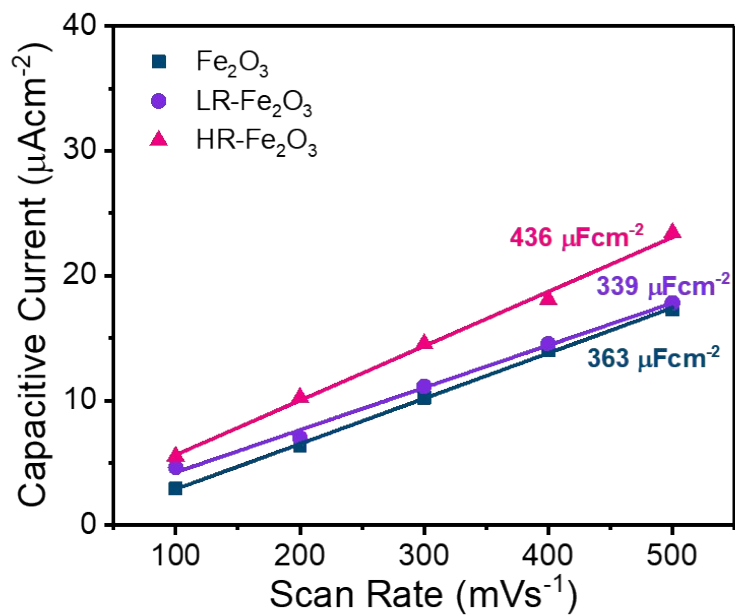

**Figure S7.** Double-layer capacitance (CDL) of  $\text{Fe}_2\text{O}_3$ , LR- $\text{Fe}_2\text{O}_3$ , and HR- $\text{Fe}_2\text{O}_3$  electrodes, computed from cyclic voltammetry measurements. These specific capacitance values are used to compute ECSAs of the catalysts as presented in **Table S1**.

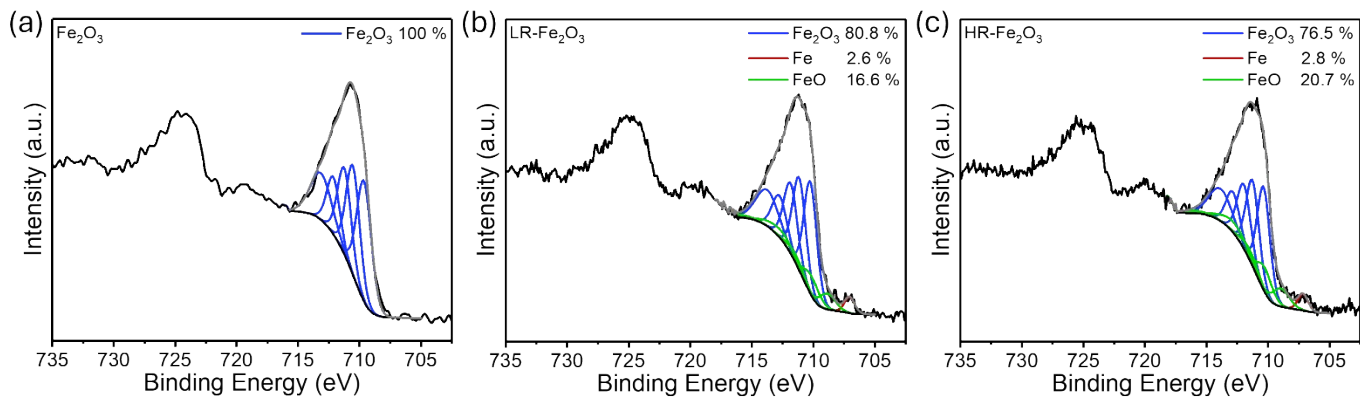

**Figure S8.** Curve fittings to the high-resolution X-ray photoelectron spectroscopy (XPS) Fe 2p spectra of **(a)** Fe<sub>2</sub>O<sub>3</sub>, **(b)** LR-Fe<sub>2</sub>O<sub>3</sub> and **(c)** HR-Fe<sub>2</sub>O<sub>3</sub>. The results demonstrate that increasing the (more negative) ERC potential leads to further reduction of Fe species. Specifically, when the electrode is preconditioned at a low reduction (LR) potential (-1.0 V vs RHE), 19.2% of Fe<sub>2</sub>O<sub>3</sub> in LR-Fe<sub>2</sub>O<sub>3</sub> is reduced to Fe and FeO, accounting for 2.6% and 16.6%, respectively. At a more negative (high reduction, HR) treatment potential (-2.0 V vs RHE), HR-Fe<sub>2</sub>O<sub>3</sub> experiences a slightly larger portion of Fe<sub>2</sub>O<sub>3</sub> (23.5%) being reduced to Fe and FeO, comprising 2.8% and 20.7%, respectively. The emergence of these FeO and metallic Fe on the catalyst surface creates FeO/Fe/Fe<sub>2</sub>O<sub>3</sub> interfaces, suggesting the construction of Fe oxide interfaces after ERC treatment.

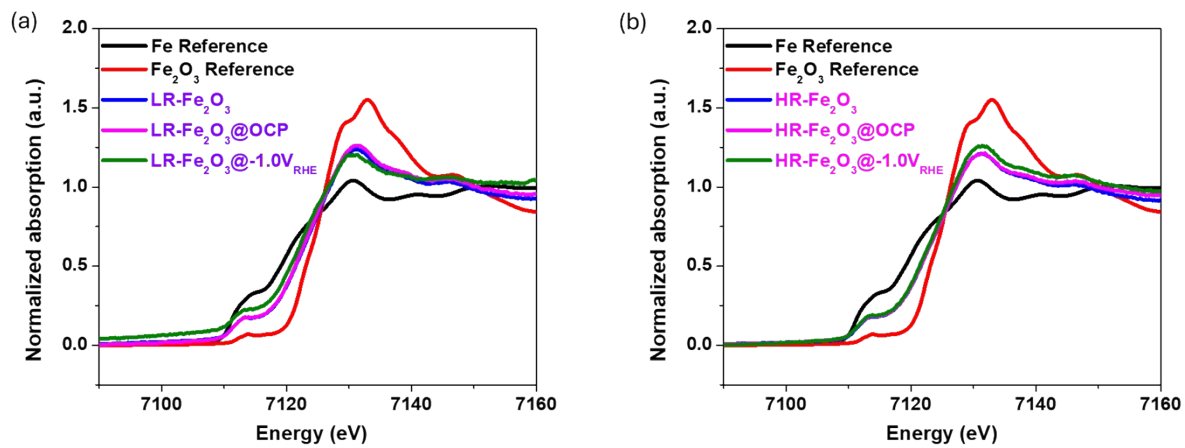

**Figure S9.** *Ex situ* XANES spectra and *in situ* XANES spectra of (a) LR-Fe<sub>2</sub>O<sub>3</sub> and (b) HR-Fe<sub>2</sub>O<sub>3</sub> catalysts collected under experimental conditions of open-circuit potential and -1.0 V vs RHE in 0.1 M KOH with 0.1 M KNO<sub>2</sub> electrolyte.

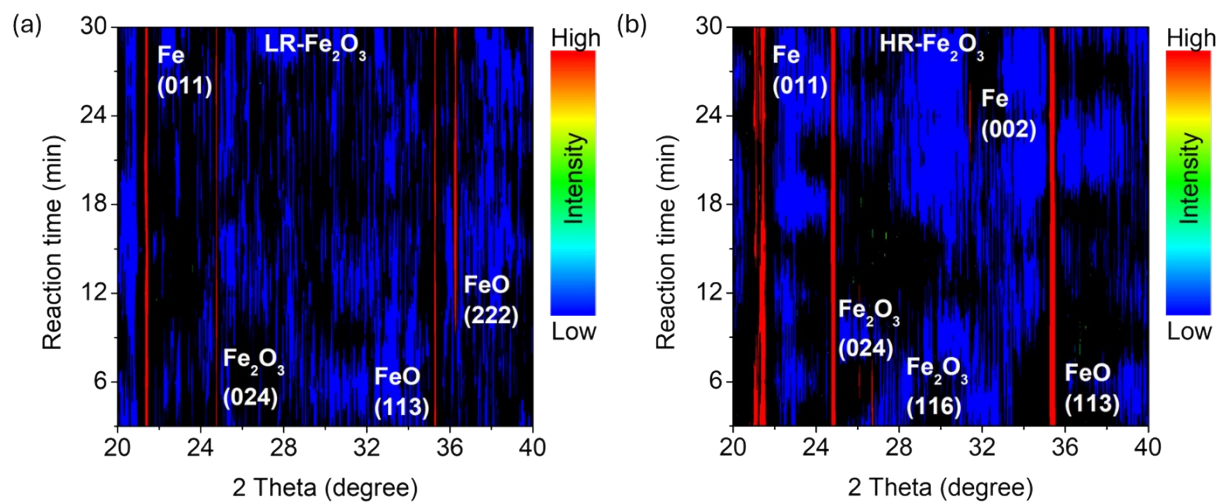

**Figure S10.** *In situ* powder diffraction (PD) of LR-Fe<sub>2</sub>O<sub>3</sub> and HR-Fe<sub>2</sub>O<sub>3</sub> catalysts at -1.0 V vs RHE in 0.1 M KOH with 0.1 M KNO<sub>2</sub> electrolyte for continuous tests of 30 minutes.

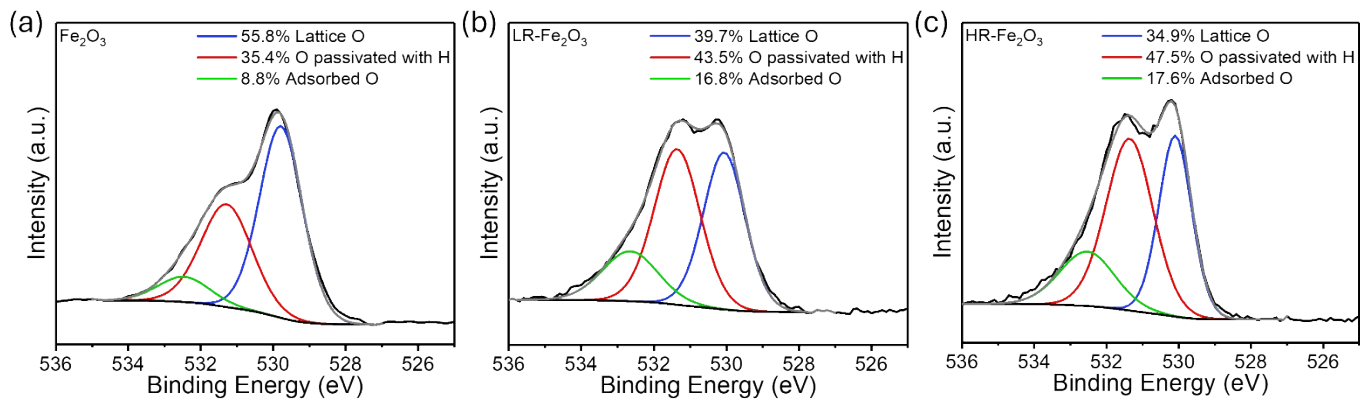

**Figure S11.** Curve fittings to the high-resolution XPS O 1s spectra of **(a)** Fe<sub>2</sub>O<sub>3</sub>, **(b)** LR-Fe<sub>2</sub>O<sub>3</sub> and **(c)** HR-Fe<sub>2</sub>O<sub>3</sub>. The results show a clear decrease in the proportion of lattice oxygen (peak at ~ 530 eV)<sup>1</sup> after ERC, which is consistent with the reduction of Fe<sub>2</sub>O<sub>3</sub> evidenced by Fe 2p XPS spectra. Specifically, LR-Fe<sub>2</sub>O<sub>3</sub> consists of 39.7% lattice oxygen, while HR-Fe<sub>2</sub>O<sub>3</sub> comprises 34.9%, both markedly lower than pristine Fe<sub>2</sub>O<sub>3</sub> (55.8%). Two other peaks at ~ 531.0 and 532.5 eV are attributed to surface oxygen passivated with hydrogen and adsorbed oxygen (water), respectively.<sup>2,3</sup> The content of surface oxygen passivated with hydrogen increases from 35.4% in pristine Fe<sub>2</sub>O<sub>3</sub> to 43.5% in LR-Fe<sub>2</sub>O<sub>3</sub> and further to 47.5% in HR-Fe<sub>2</sub>O<sub>3</sub>. Similarly, adsorbed oxygen (water) increases from 8.8% in pristine Fe<sub>2</sub>O<sub>3</sub> to 16.8% in LR-Fe<sub>2</sub>O<sub>3</sub> and 17.6% in HR-Fe<sub>2</sub>O<sub>3</sub>.

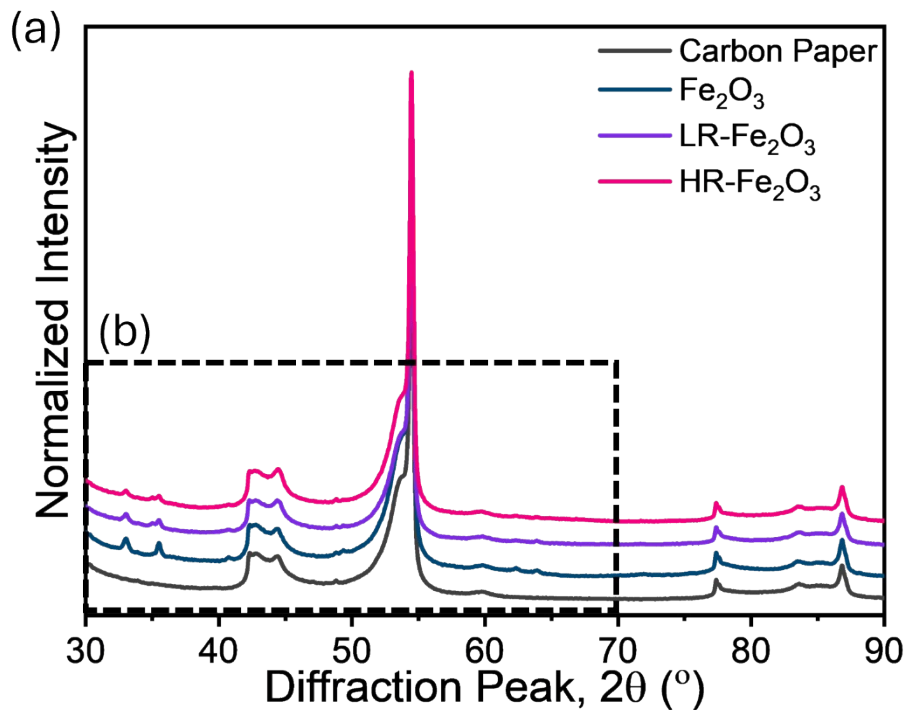

**Figure S12.** (a) Normalized X-ray diffraction (XRD) patterns (intensity normalized to the highest peak) of pristine Fe<sub>2</sub>O<sub>3</sub>, LR-Fe<sub>2</sub>O<sub>3</sub>, and HR-Fe<sub>2</sub>O<sub>3</sub>, with (b) excerpt for patterns in diffraction peak range of 30° to 70° as presented in **Figure 2b, i**. The XRD patterns show that pristine Fe<sub>2</sub>O<sub>3</sub> displays peaks at ~ 33.0, 35.5, 40.7, 49.4, 62.3, and 63.9°, corresponding to the (104), (110), (113), (024), (214), and (300) planes of  $\alpha$ -Fe<sub>2</sub>O<sub>3</sub>, respectively (JCPDS collection code: 01-080-0597). The post-conditioned electrodes, LR-Fe<sub>2</sub>O<sub>3</sub> and HR-Fe<sub>2</sub>O<sub>3</sub>, exhibit similar peaks, confirming the retention of the  $\alpha$ -Fe<sub>2</sub>O<sub>3</sub> structure. However, a new split from the (110) peak at ~ 35.0°, is observed to appear in both conditioned samples. This split peak, corresponding to the (101) plane of  $\alpha$ -Fe<sub>2</sub>O<sub>3</sub>, indicates a partial phase shift in the crystal structure. The diffraction features at 40-45° and 50-55° are attributed to the (100)/(101) and (004) planes of graphitic carbon, respectively, originating from the carbon paper substrate (ICDD:01-075-1621).

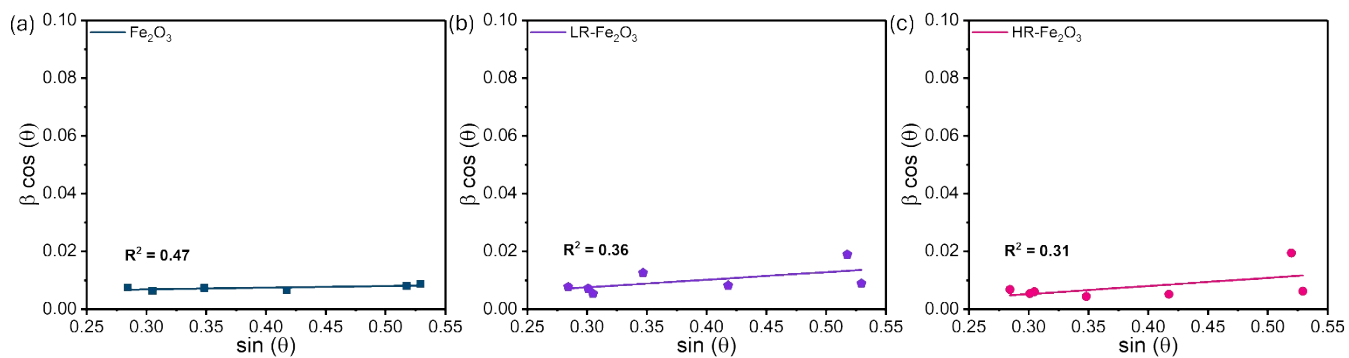

**Figure S13.** Williamson-Hall (WH) plots of (a) pristine  $\text{Fe}_2\text{O}_3$ , (b) LR- $\text{Fe}_2\text{O}_3$ , and (c) HR- $\text{Fe}_2\text{O}_3$ . The WH plots estimate lattice strains of 6.0%, 26.3%, and 28.0% for  $\text{Fe}_2\text{O}_3$ , LR- $\text{Fe}_2\text{O}_3$ , and HR- $\text{Fe}_2\text{O}_3$ , respectively.

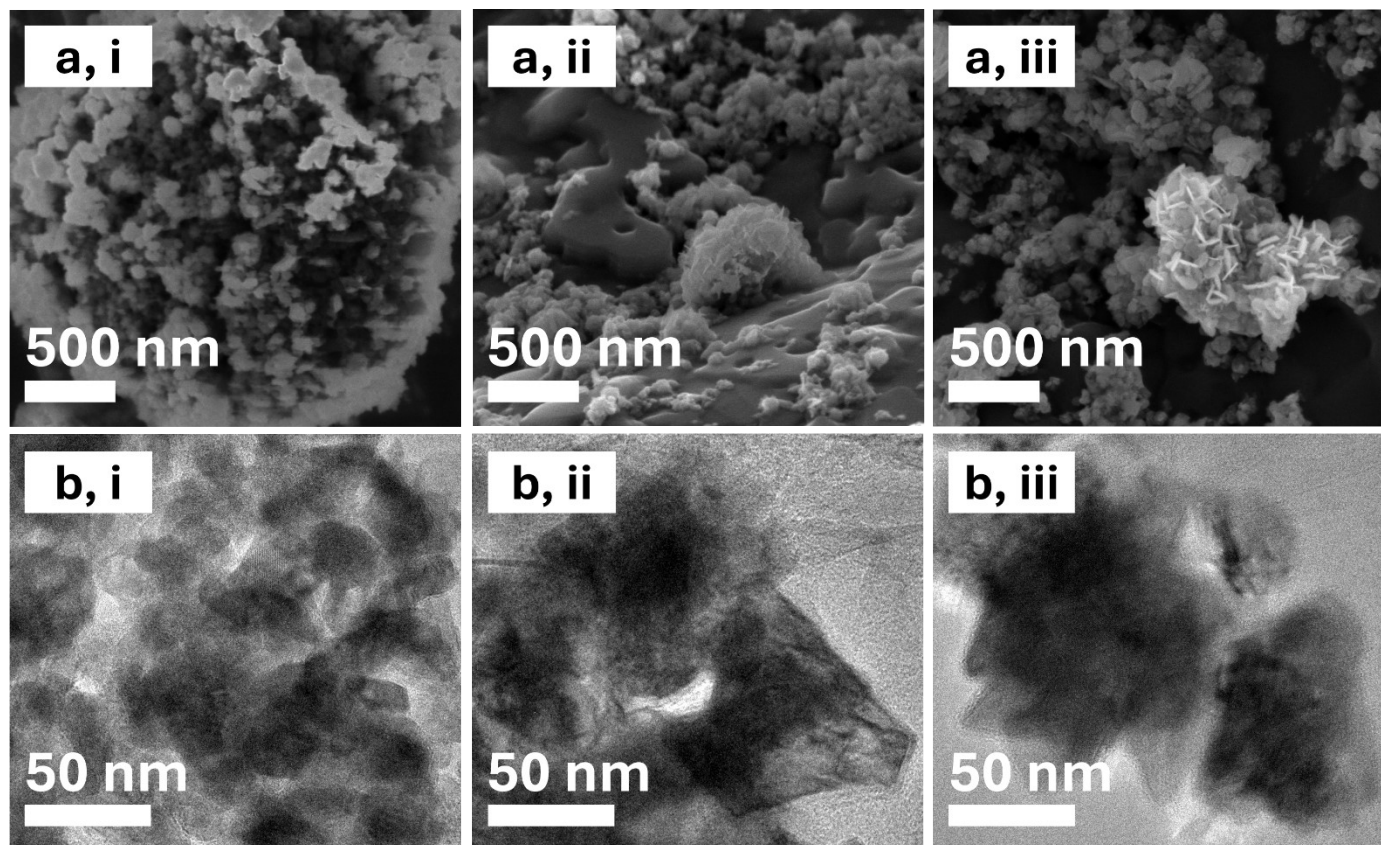

**Figure S14.** (a) Scanning electron microscopy (SEM) and (b) transmission electron microscopy (TEM) images of (i) pristine Fe<sub>2</sub>O<sub>3</sub>, (ii) LR-Fe<sub>2</sub>O<sub>3</sub>, and (iii) HR-Fe<sub>2</sub>O<sub>3</sub>. The pristine Fe<sub>2</sub>O<sub>3</sub> catalyst displays morphology with irregular spherical nanoparticles that agglomerate into large clusters. After ERC, both LR-Fe<sub>2</sub>O<sub>3</sub> and HR-Fe<sub>2</sub>O<sub>3</sub> present a morphology consisting of a mixture of irregular spherical and plate-like shaped nanoparticles.

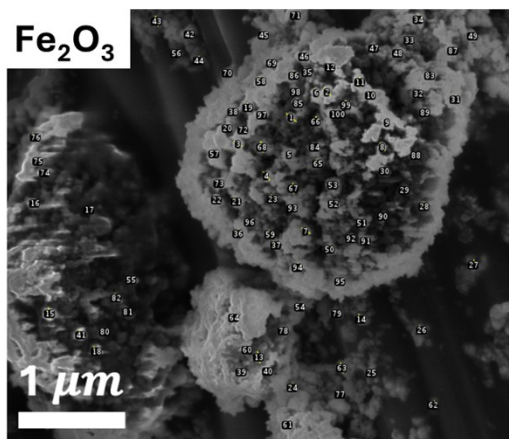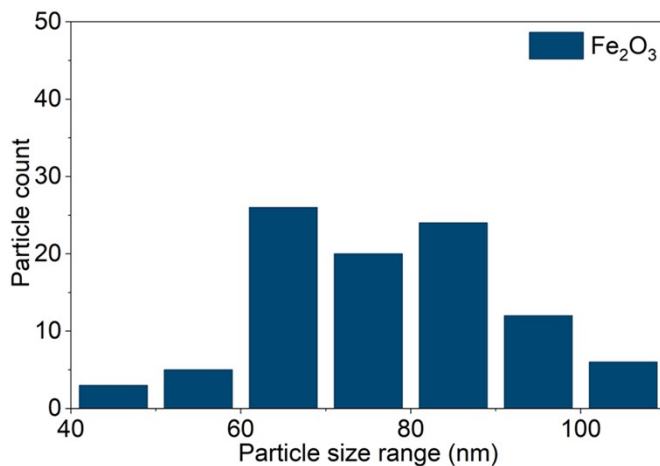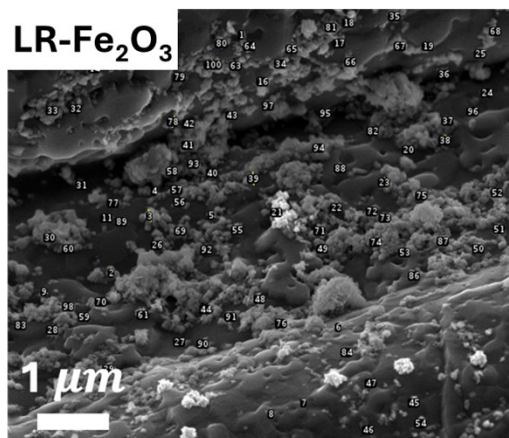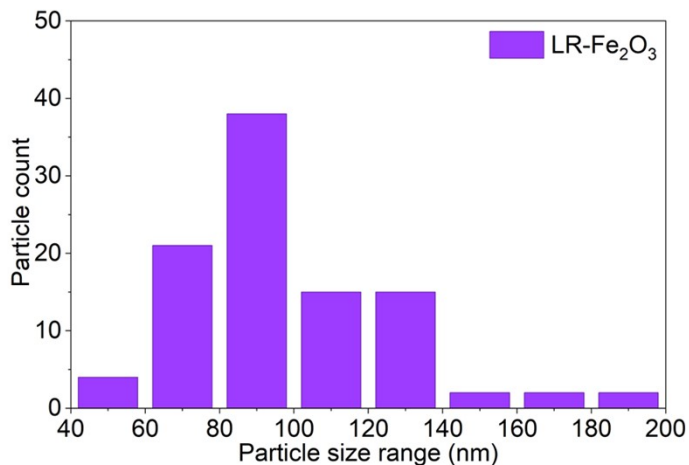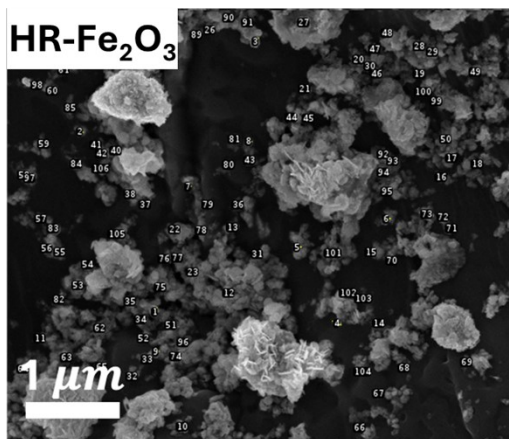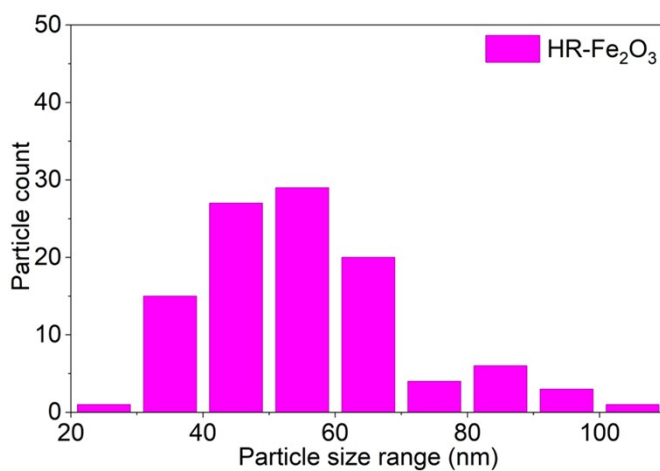

**Figure S15.** The SEM images of Fe<sub>2</sub>O<sub>3</sub>, LR-Fe<sub>2</sub>O<sub>3</sub>, and HR-Fe<sub>2</sub>O<sub>3</sub> samples and particle size distributions of the randomly selected area within the SEM images. Fe<sub>2</sub>O<sub>3</sub> primarily consists of nanoparticles with sizes in the range of 60 to 100 nm. LR-Fe<sub>2</sub>O<sub>3</sub> exhibits similar nanoparticle sizes (60 to 100 nm), along with the presence of flake-like aggregates formed by particle assembly. HR-Fe<sub>2</sub>O<sub>3</sub> displays relatively smaller nanoparticles (40 to 70 nm) and also shows more flake-like aggregation than LR-Fe<sub>2</sub>O<sub>3</sub>.

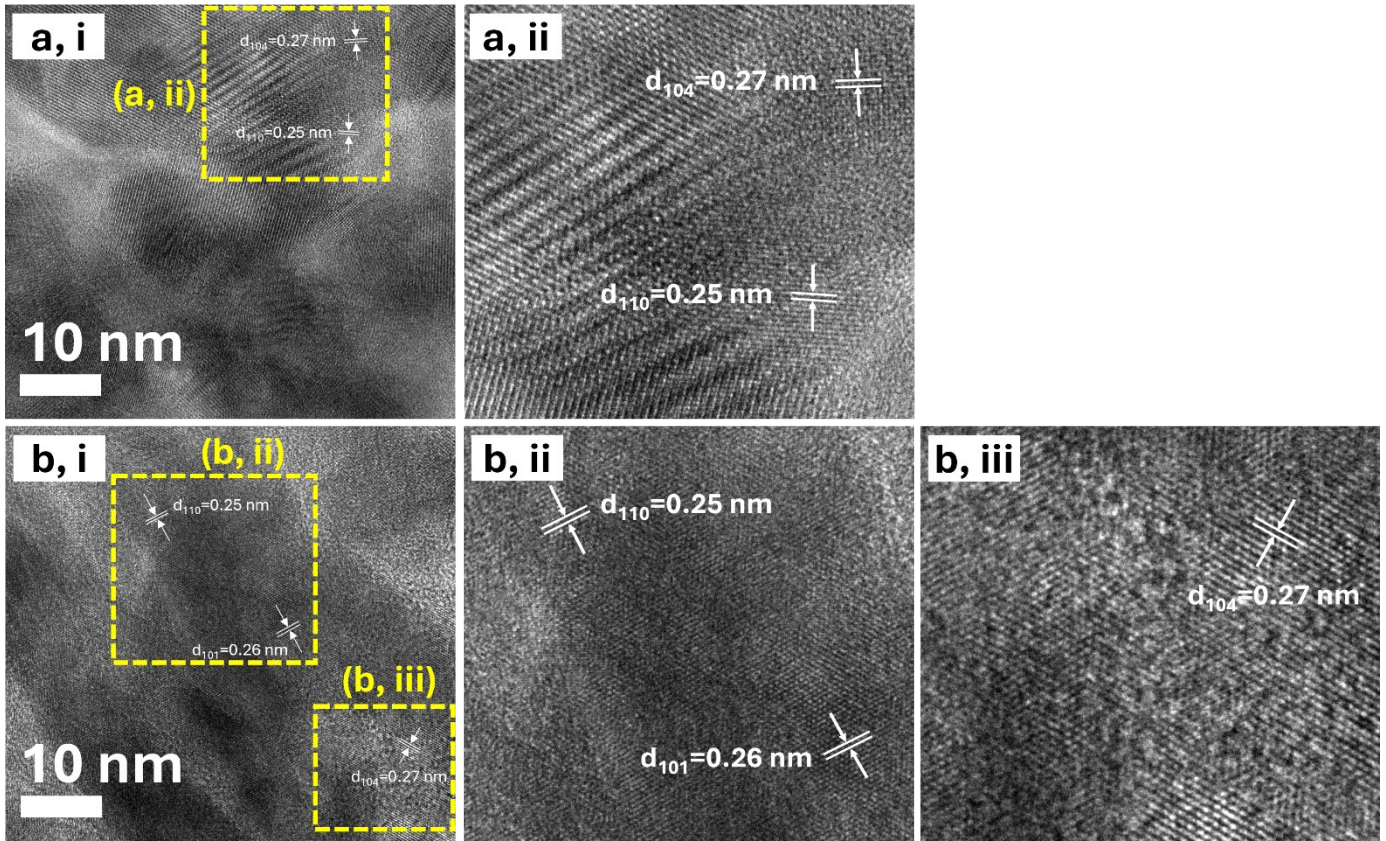

**Figure S16.** High-resolution TEM (HR-TEM) images of (a) pristine Fe<sub>2</sub>O<sub>3</sub> and (b) LR-Fe<sub>2</sub>O<sub>3</sub> at (i) a magnification of 10 nm, with (ii) and (iii) showing enlarged views of specific areas indicated in (i). The results show all samples demonstrate lattice spacings of 0.27 and 0.25 nm corresponding to the (104) and (110) planes of  $\alpha$ -Fe<sub>2</sub>O<sub>3</sub>, respectively.<sup>1,4</sup> Additionally, both LR-Fe<sub>2</sub>O<sub>3</sub> display a lattice spacing of 0.26 nm, which corresponds to the (101) plane of  $\alpha$ -Fe<sub>2</sub>O<sub>3</sub>.

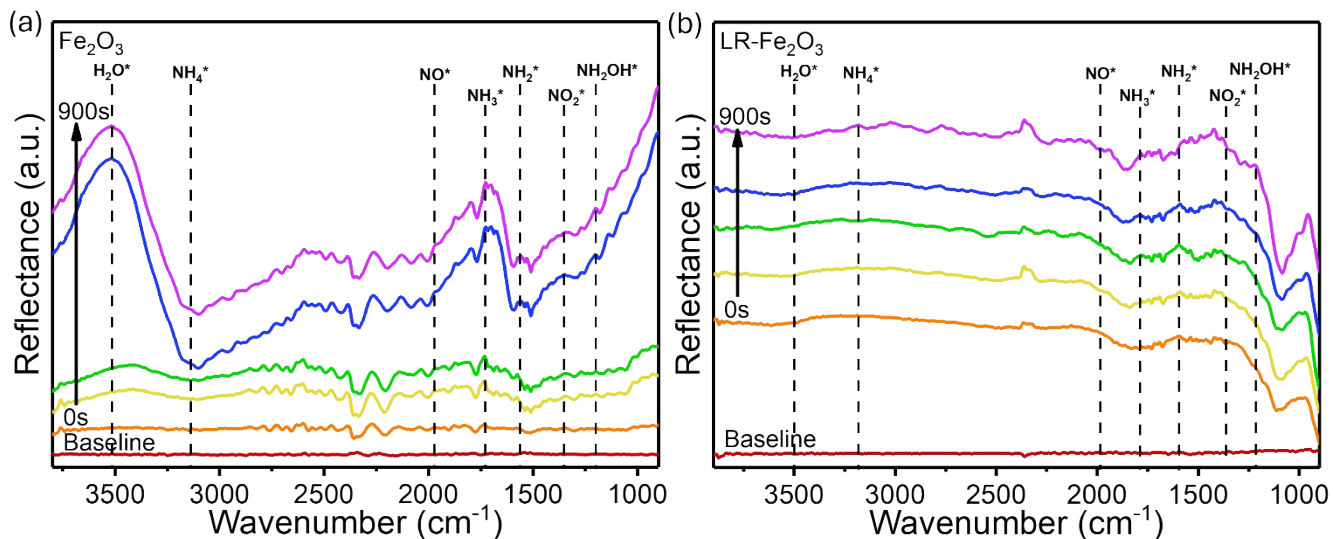

**Figure S17.** *In situ* FTIR spectra of (a) Fe<sub>2</sub>O<sub>3</sub> and (b) LR-Fe<sub>2</sub>O<sub>3</sub> at NO<sub>2</sub>RR applied potential of -1.0 V vs RHE for 15 mins in electrolyte condition of 0.1 M KOH + 0.1 M KNO<sub>2</sub>. The results reveal peaks corresponding to various intermediates: NH<sub>2</sub>OH\* (1215 cm<sup>-1</sup>), NO<sub>2</sub>\* (1362 cm<sup>-1</sup>), NH<sub>2</sub>\* (1563 cm<sup>-1</sup>), NH<sub>3</sub>\* (1767 cm<sup>-1</sup>), NO\* (1971 cm<sup>-1</sup>), NH<sub>4</sub>\* (3142 cm<sup>-1</sup>), and H<sub>2</sub>O\* (3500 cm<sup>-1</sup>).<sup>5-14</sup>

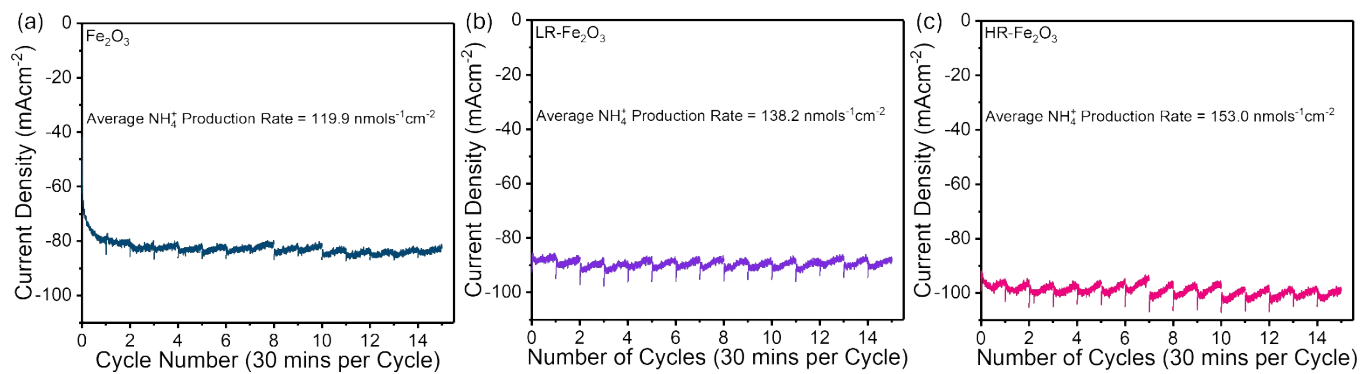

**Figure S18.** Chronoamperometric *i-t* curves of 15-cycle test (30 mins each cycle) of all electrodes at -1.0 V vs RHE: **(a)** Fe<sub>2</sub>O<sub>3</sub>, **(b)** LR-Fe<sub>2</sub>O<sub>3</sub>, and **(c)** HR-Fe<sub>2</sub>O<sub>3</sub>. All electrodes demonstrate high NO<sub>2</sub>RR activity over prolonged periods, confirming their stability. Among them, HR-Fe<sub>2</sub>O<sub>3</sub> catalyst exhibits the highest NO<sub>2</sub>RR performance, achieving an average NH<sub>4</sub><sup>+</sup> production rate of 153.0 nmol s<sup>-1</sup> cm<sup>-2</sup> and FE<sub>NH<sub>4</sub><sup>+</sup></sub> of 93%.

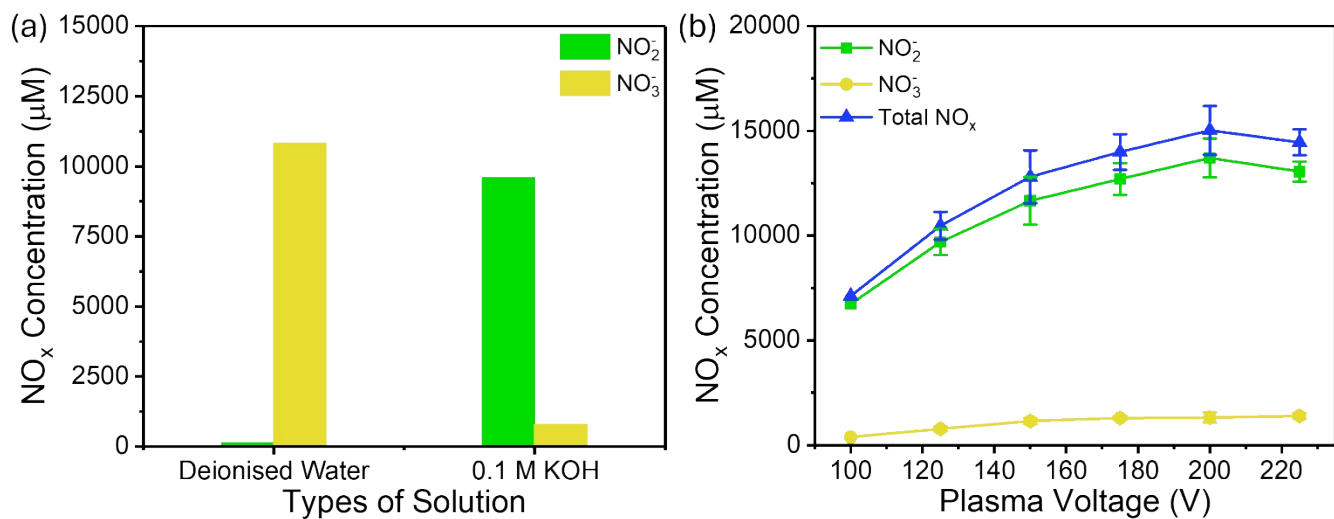

**Figure S19.** Production of NO<sub>x</sub> via plasma system at varying (a) electrolyte pH conditions (neutral vs alkaline) and (b) plasma voltage under constant plasma operating conditions of 66 µs duty, 900 Hz discharge frequency, and 60 kHz resonance frequency. The results indicate that the alkaline condition (0.1 M KOH) significantly favors the production of NO<sub>2</sub><sup>-</sup> (9.6 mM) over NO<sub>3</sub><sup>-</sup> (0.8 mM), whereas in neutral environments, the production trends reverse, favoring NO<sub>3</sub><sup>-</sup> over NO<sub>2</sub><sup>-</sup>. In addition, the results indicate that the highest amounts of NO<sub>2</sub><sup>-</sup> and total NO<sub>x</sub> are produced at 200 V, with concentrations of 13.7 and 15.0 mM, respectively.

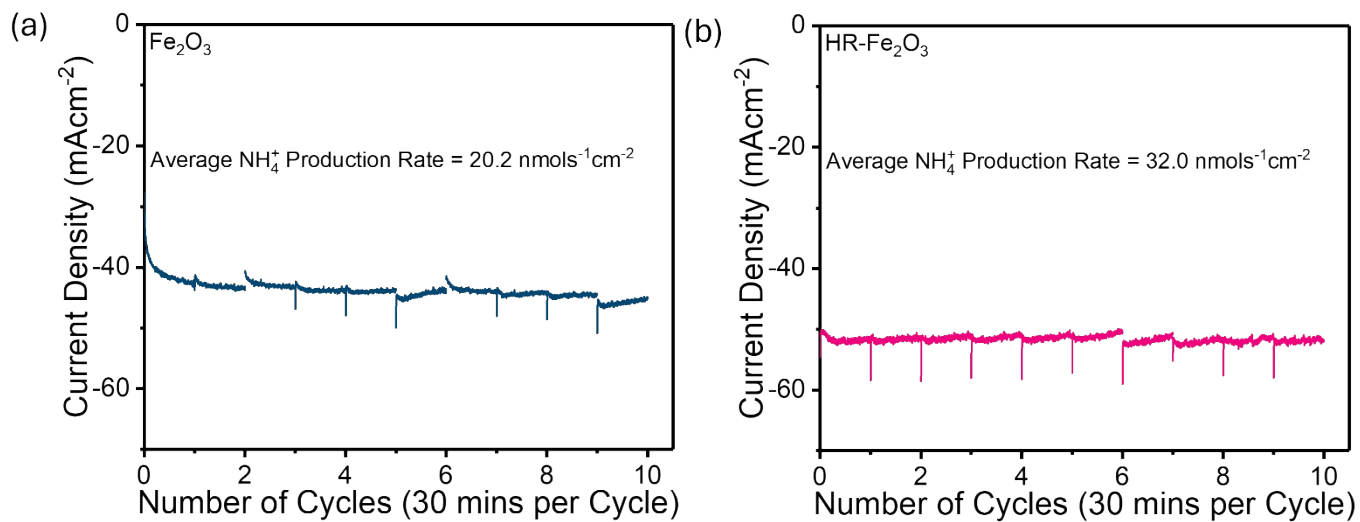

**Figure S20.** Chronoamperometric  $i-t$  curves of 10-cycle test (30 mins each cycle) of (a)  $\text{Fe}_2\text{O}_3$  and (b)  $\text{HR-Fe}_2\text{O}_3$  electrodes at -1.0 V vs RHE in PAAE electrolyte. The results demonstrate the high stability of both  $\text{Fe}_2\text{O}_3$  and  $\text{HR-Fe}_2\text{O}_3$  across the 10-cycle operation at -1.0 V vs RHE. The results also suggest that  $\text{HR-Fe}_2\text{O}_3$  outperforms pristine  $\text{Fe}_2\text{O}_3$  under low  $\text{NO}_x$  concentrations, achieving a stable  $\text{NH}_4^+$  production rate of 32.0  $\text{nmol s}^{-1} \text{cm}^{-2}$  and a steady current density of  $\sim 52 \text{ mA cm}^{-2}$  across 10-cycle tests at -1.0 V vs RHE.

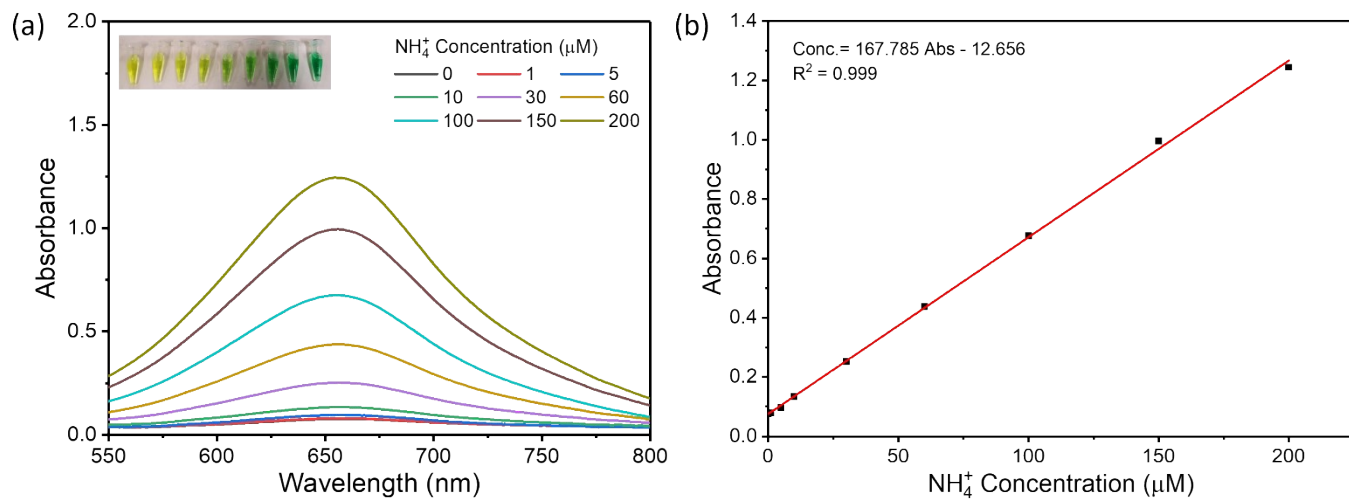

**Figure S21.** (a) UV-Vis absorption spectra with wavelengths ranging from 550 to 800 nm and its corresponding (b)  $\text{NH}_4^+$  calibration curve of indophenol blue test using  $(\text{NH}_4)_2\text{SO}_4$  standard solutions.

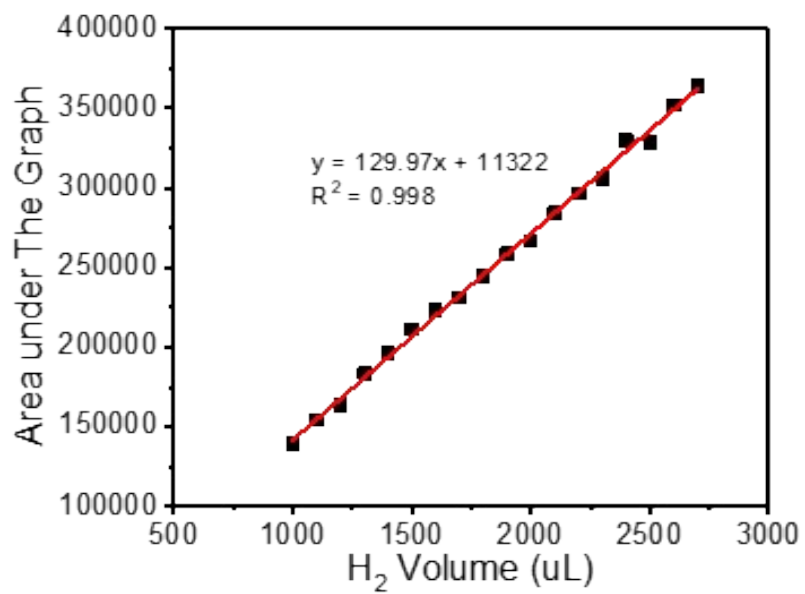

Figure S22. H<sub>2</sub> calibration curve produced with GC.

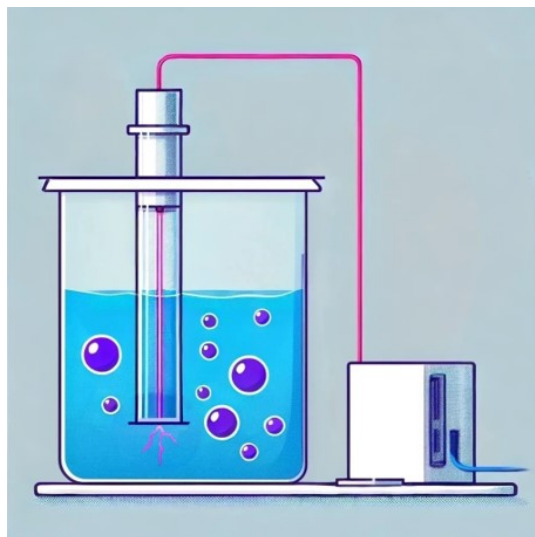

**Figure S23.** Illustration of the in-house, custom-built plasma system (as described in the work by Jing et al.<sup>15</sup>), comprising of a plasma generator ('Leap 100' from PlasmaLeap Technologies) and a plasma reactor.

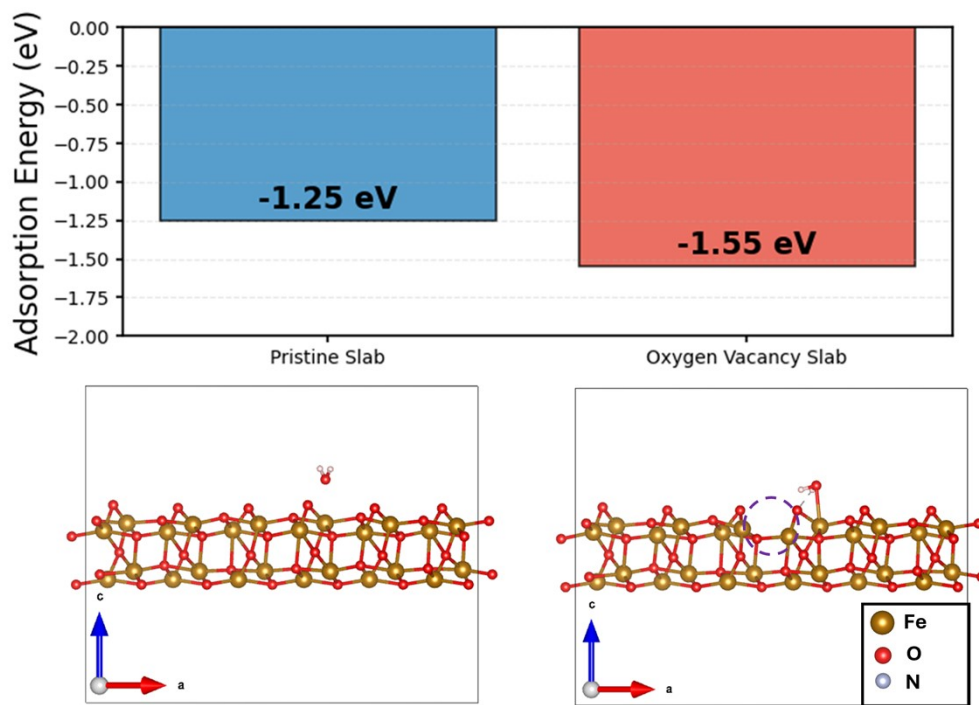

**Figure S24.** DFT calculated H<sub>2</sub>O adsorption energies and optimized structural configurations on pristine and oxygen vacancy hematite (104) surfaces.

## Supporting Tables

**Table S1.** Electrochemically active surface area (ECSAs) of Fe<sub>2</sub>O<sub>3</sub>, LR-Fe<sub>2</sub>O<sub>3</sub>, and HR-Fe<sub>2</sub>O<sub>3</sub> electrodes. The final ECSAs were computed by having the specific capacitance in **Figure S6** divided by the reference blank glassy carbon (40 μFcm<sup>-2</sup>), and then multiplied with geometric area.<sup>16</sup>

| Electrode                         | ECSA (cm <sup>2</sup> ) |
|-----------------------------------|-------------------------|
| Fe <sub>2</sub> O <sub>3</sub>    | 6.1                     |
| LR-Fe <sub>2</sub> O <sub>3</sub> | 5.1                     |
| HR-Fe <sub>2</sub> O <sub>3</sub> | 6.7                     |

**Table S2.**  $\alpha$ -Fe<sub>2</sub>O<sub>3</sub> crystallite (calculated via Scherrer equation) and lattice parameter ( $\alpha$ -Fe<sub>2</sub>O<sub>3</sub> d-spacing) of Fe<sub>2</sub>O<sub>3</sub>, LR-Fe<sub>2</sub>O<sub>3</sub> and HR-Fe<sub>2</sub>O<sub>3</sub>. The results reveal no obvious trend or significant change in crystallite size and lattice spacing with different ERC potentials.

| Sample                            | Plane | Crystallite Size (nm) |       |       | d-spacing (Å) |       |       |
|-----------------------------------|-------|-----------------------|-------|-------|---------------|-------|-------|
|                                   |       | (104)                 | (110) | (101) | (104)         | (110) | (101) |
| Fe <sub>2</sub> O <sub>3</sub>    |       | 18                    | 22    | -     | 2.710         | 2.526 | -     |
| LR-Fe <sub>2</sub> O <sub>3</sub> |       | 18                    | 26    | 19    | 2.710         | 2.526 | 2.559 |
| HR-Fe <sub>2</sub> O <sub>3</sub> |       | 20                    | 23    | 26    | 2.710         | 2.527 | 2.560 |

**Table S3.** State-of-the-art NO<sub>x</sub>RR-to-NH<sub>3</sub>/NH<sub>4</sub><sup>+</sup> electrocatalysts.

| Catalyst                                           | Electrolyte                                                                                                  | Potential<br>(V <sub>RHE</sub> ) | Current Density<br>(mA cm <sup>-2</sup> ) | NH <sub>3</sub> /NH <sub>4</sub> <sup>+</sup> Yield<br>(nmol s <sup>-1</sup> cm <sup>-2</sup> ) | FE <sub>NH4+</sub><br>(%) | Key Features                                                                                     | Ref.                 |
|----------------------------------------------------|--------------------------------------------------------------------------------------------------------------|----------------------------------|-------------------------------------------|-------------------------------------------------------------------------------------------------|---------------------------|--------------------------------------------------------------------------------------------------|----------------------|
| HR-Fe <sub>2</sub> O <sub>3</sub>                  | 0.1 M KOH +<br>0.1 M KNO <sub>2</sub>                                                                        | -1.0                             | ~ 96.5 <sup>(a)</sup>                     | 153                                                                                             | 93                        | Disordered structure:<br>Fe <sup>3+</sup> /Fe <sup>2+</sup> /Fe interfaces<br>and lattice strain | <b>This<br/>work</b> |
| a-RuO <sub>2</sub>                                 | 0.5 M Na <sub>2</sub> SO <sub>4</sub> +<br>NaNO <sub>3</sub> (200<br>ppm NO <sub>3</sub> <sup>-</sup> -N)    | -0.35                            | NA                                        | 32.2                                                                                            | 97.5                      | Disordered structure,<br>oxygen vacancies                                                        | 17                   |
| Ru-ST-12                                           | 1 M KOH + 1 M<br>KNO <sub>3</sub>                                                                            | -0.20                            | ~ 105 <sup>(a)</sup>                      | 164                                                                                             | ~ 100                     | Lattice strain                                                                                   | 18                   |
| Pd (111)                                           | 0.1 M Na <sub>2</sub> SO <sub>4</sub> +<br>0.1 M NO <sub>3</sub> <sup>-</sup>                                | -0.70                            | ~ 130                                     | 152                                                                                             | 79.9                      | Optimised NO <sub>3</sub> <sup>-</sup><br>adsorption energy                                      | 19                   |
| Cuboctahedron<br>Pd/C                              | 0.1 M NaOH +<br>20 mM NaNO <sub>3</sub>                                                                      | -0.20                            | 4.25 <sup>(b)</sup>                       | 7.51                                                                                            | 35.1                      | Synergistic effects of Pd<br>(111) and Pd (100)                                                  | 20                   |
| Rh (110)                                           | 0.1 M KOH +<br>0.1 M KNO <sub>3</sub>                                                                        | 0.10                             | NA                                        | 0.561                                                                                           | 20.8                      | Rh (110) with optimised<br>activation energy to<br>convert N* to NH*<br>RDS                      | 21                   |
| SAC Rh <sub>1</sub>                                | 0.5 M Na <sub>2</sub> SO <sub>4</sub> +<br>0.1 M NaNO <sub>2</sub>                                           | -0.70                            | ~ 89.0                                    | 131                                                                                             | 85.9                      | Enhanced activation<br>and hydrogenation of<br>NO <sub>2</sub> RR                                | 22                   |
| OD-Ag                                              | 0.1 M NO <sub>3</sub> <sup>-</sup> +<br>0.1 M KCl                                                            | -0.92                            | NA                                        | NA                                                                                              | 89.0                      | Enhanced ECSAs, Ag<br>(211) with better NO <sub>3</sub> *<br>adsorption capabilities             | 23                   |
| Metastable<br>phase Cu                             | 1 M KOH +<br>0.05 M NO <sub>3</sub> <sup>-</sup>                                                             | -0.30                            | 135 <sup>(a)</sup>                        | 151                                                                                             | 99.8                      | Shifted d-band centre<br>closer to Fermi level                                                   | 24                   |
| Cu-LC-10                                           | 0.5 M Na <sub>2</sub> SO <sub>4</sub> +<br>NaNO <sub>3</sub>                                                 | -0.80                            | NA                                        | 173                                                                                             | 94.7                      | Shifted d-band centre<br>closer to Fermi level                                                   | 25                   |
| u-Cu NWs                                           | 0.5 M Na <sub>2</sub> SO <sub>4</sub> +<br>0.1 M NaNO <sub>2</sub>                                           | -0.70                            | ~ 80.0                                    | 137                                                                                             | 94.7                      | Shifted d-band centre<br>closer to Fermi level                                                   | 26                   |
| OD-Cu                                              | 0.1 M PBS + 0.1<br>M KNO <sub>3</sub>                                                                        | -0.90                            | NA                                        | 61.1                                                                                            | 93.9                      | Cu <sup>0</sup> active sites                                                                     | 27                   |
| OD-Cu                                              | 1 M KOH + 100<br>mM NO <sub>3</sub> <sup>-</sup>                                                             | -0.15                            | NA                                        | 306                                                                                             | 91.6                      | Cu <sup>0</sup> active sites                                                                     | 28                   |
| Cu nanodisks                                       | 0.1 M KOH +<br>10 mM KNO <sub>3</sub>                                                                        | -0.50                            | NA                                        | 166                                                                                             | 81.1                      | New, stable<br>configuration of<br>triatomic Cu clusters                                         | 29                   |
|                                                    | And                                                                                                          |                                  |                                           |                                                                                                 |                           |                                                                                                  |                      |
|                                                    | 0.1 M KOH +<br>10 mM KNO <sub>2</sub>                                                                        | -0.50                            |                                           | 89.3                                                                                            | 49.6                      |                                                                                                  |                      |
| e-Cu                                               | 1 M KOH + 50<br>mM KNO <sub>3</sub>                                                                          | -0.40                            | ~ 33.5                                    | ~ 39.4                                                                                          | 91.5                      | New, stable<br>configuration of<br>triatomic Cu clusters                                         | 30                   |
| OD-Cu:<br>CuO- vs Cu <sub>2</sub> O-<br>derived Cu | 0.5 M Na <sub>2</sub> SO <sub>4</sub> +<br>100 mg/L NO <sub>3</sub> <sup>-</sup> -<br>N (NaNO <sub>3</sub> ) | -1.30                            | NA                                        | 86.1                                                                                            | 80.0                      | <i>In situ</i> generated<br>stacking faults, tensile<br>strain                                   | 31                   |
| Cu <sub>2</sub> O<br>nanocubes                     | 0.1 M Na <sub>2</sub> SO <sub>4</sub> +<br>8 mM NaNO <sub>3</sub>                                            | -0.30                            | ~ 16.0                                    | 12.5                                                                                            | ~ 88.0                    | Cu <sub>2</sub> O/Cu interfaces                                                                  | 32                   |
|                                                    | And                                                                                                          |                                  |                                           |                                                                                                 |                           |                                                                                                  |                      |
|                                                    | 0.1 M Na <sub>2</sub> SO <sub>4</sub> +<br>8 mM NaNO <sub>2</sub>                                            | -0.30                            | NA                                        | 13.6                                                                                            | 91.5                      |                                                                                                  |                      |
| Cu/Cu <sub>2</sub> O<br>NWAs                       | 0.5 M Na <sub>2</sub> SO <sub>4</sub> +<br>200 ppm NO <sub>3</sub> <sup>-</sup> -N<br>(NaNO <sub>3</sub> )   | -0.85                            | 100                                       | 68.0                                                                                            | 95.8                      | Cu <sub>2</sub> O/Cu interfaces,<br>enhanced electron<br>transfer                                | 33                   |

**Table S3 (Continued).** State-of-the-art NO<sub>x</sub>RR-to-NH<sub>3</sub>/NH<sub>4</sub><sup>+</sup> electrocatalysts.

| Catalyst                                                                    | Electrolyte                                                                                          | Potential<br>(V <sub>RHE</sub> ) | Current Density<br>(mA cm <sup>-2</sup> ) | NH <sub>3</sub> /NH <sub>4</sub> <sup>+</sup> Yield<br>(nmol s <sup>-1</sup> cm <sup>-2</sup> ) | FE <sub>NH4+</sub><br>(%) | Key Features                                                                                            | Ref. |
|-----------------------------------------------------------------------------|------------------------------------------------------------------------------------------------------|----------------------------------|-------------------------------------------|-------------------------------------------------------------------------------------------------|---------------------------|---------------------------------------------------------------------------------------------------------|------|
| Cu/Cu <sub>2</sub> O/HTC-350                                                | 0.5 M Na <sub>2</sub> SO <sub>4</sub> + 200 ppm NO <sub>3</sub> <sup>-</sup> -N (NaNO <sub>3</sub> ) | -0.95                            | NA                                        | 3.92                                                                                            | 89.5                      | Cu <sub>2</sub> O/Cu interfaces, enhanced electron transfer                                             | 34   |
| OVs-Cu/Cu <sub>2</sub> O NRs                                                | 0.5 M Na <sub>2</sub> SO <sub>4</sub> + 100 ppm NO <sub>3</sub> <sup>-</sup> -N                      | -0.60                            | 30.0                                      | 74.7                                                                                            | 84.9                      | Oxygen vacancies, Cu <sub>2</sub> O/Cu interfaces, synergistic effect of Cu and Cu <sub>2</sub> O sites | 35   |
| R-Cu <sub>2</sub> O/Cu/CF                                                   | 1 M KOH + 250 mg/L NO <sub>3</sub> <sup>-</sup>                                                      | -0.25                            | 14.0                                      | 35.4                                                                                            | 84.4                      | Cu <sub>2</sub> O/Cu interfaces, enhanced electron transfer                                             | 5    |
| Cu NWAs                                                                     | PAW + 0.01 M H <sub>2</sub> SO <sub>4</sub> (PAW = 12 mM NO <sub>3</sub> <sup>-</sup> )              | -0.60                            | NA                                        | 45.0                                                                                            | 100                       | Synergistic effect of Cu <sup>0</sup> /Cu <sup>+</sup> active sites, oxygen vacancies                   | 15   |
| Cu <sub>2</sub> O/Cu(OH) <sub>2</sub>                                       | 0.1 M KOH + 500 ppm NO <sub>3</sub> <sup>-</sup> (KNO <sub>3</sub> )                                 | -0.40                            | ~ 9.00                                    | 153                                                                                             | 77.0                      | Enhanced electron transfer, shifted d-band centre closer to Fermi level                                 | 36   |
| FSP-CuO                                                                     | 0.05 M KNO <sub>3</sub> + 0.05 M H <sub>2</sub> SO <sub>4</sub>                                      | -0.50                            | NA                                        | ~ 62.5                                                                                          | NA                        | Oxygen vacancies                                                                                        | 37   |
| CF@Cu <sub>2</sub> O                                                        | 0.1 M PBS + 0.1 M NaNO <sub>2</sub>                                                                  | -1.00                            | ~ 40.0                                    | 122                                                                                             | 94.2                      | Oxygen vacancies                                                                                        | 38   |
| dr-Cu NPs                                                                   | 0.5 M K <sub>2</sub> SO <sub>4</sub> + 50 ppm KNO <sub>3</sub> <sup>-</sup> -N                       | -0.26                            | NA                                        | 12.6                                                                                            | 85.5                      | Defect-rich                                                                                             | 39   |
| FOSP-Cu                                                                     | 0.1 M Na <sub>2</sub> SO <sub>4</sub> + 0.1 M KNO <sub>3</sub>                                       | -0.27                            | NA                                        | 28.2                                                                                            | 93.9                      | Open reaction environment, improved liquid-mass transfer                                                | 40   |
| SAC Co <sub>1</sub> /C <sub>3</sub> N <sub>4</sub>                          | 0.5 M Na <sub>2</sub> SO <sub>4</sub> + 0.1 M NaNO <sub>2</sub>                                      | -0.70                            | ~ 65.0                                    | 112                                                                                             | 95.7                      | Improved NO <sub>2</sub> <sup>-</sup> activation and optimised formation energy of NOH*                 | 41   |
| Different transition metal oxides: Co <sub>3</sub> O <sub>4</sub> (highest) | 1 M KOH + 0.3 M KNO <sub>3</sub>                                                                     | -0.25                            | NA                                        | ~ 278                                                                                           | 85.2                      | Unique physiochemical properties, optimised electronic structure                                        | 42   |
| OH-derived Co NAs                                                           | 1 M KOH + 0.1 M NO <sub>3</sub> <sup>-</sup> (KNO <sub>3</sub> )                                     | -0.14                            | ~ 900                                     | 1156                                                                                            | 100                       | Improved conductivity, optimised adsorption energies                                                    | 43   |
| Co/CoO NSAs                                                                 | 0.1 M Na <sub>2</sub> SO <sub>4</sub> + 200 ppm NO <sub>3</sub> <sup>-</sup> -N (NaNO <sub>3</sub> ) | -0.26                            | NA                                        | 54.0                                                                                            | 93.8                      | Co/CoO interfaces                                                                                       | 44   |
| OVs-Co <sub>3</sub> O <sub>4</sub> /Co-h                                    | 0.1 M Na <sub>2</sub> SO <sub>4</sub> + 1 mg/mL NO <sub>3</sub> <sup>-</sup> (KNO <sub>3</sub> )     | -0.80                            | ~ 60.0                                    | 72.2                                                                                            | 88.7                      | Oxygen vacancies                                                                                        | 45   |
| OVs-Co <sub>3</sub> O <sub>4</sub> -x/Co                                    | 0.1 M PBS + 0.1 M KNO <sub>2</sub>                                                                   | -0.80                            | NA                                        | 136                                                                                             | 97.0                      | Oxygen vacancies                                                                                        | 46   |
| V <sub>Co</sub> -Co <sub>3</sub> O <sub>4</sub> /CC                         | 0.1 M NaOH + 0.1 M NaNO <sub>3</sub>                                                                 | -0.40                            | 40.0 <sup>(a)</sup>                       | 108                                                                                             | 97.2                      | Co vacancies                                                                                            | 47   |
| Fe SAC                                                                      | 0.1 M K <sub>2</sub> SO <sub>4</sub> + 0.5 M KNO <sub>3</sub>                                        | -0.66                            | 35.3 <sup>(a)</sup>                       | 34.2                                                                                            | ~ 75.0                    | Lacking neighbouring metal sites, suppressed N <sub>2</sub> formation                                   | 48   |
| Fe <sub>2</sub> O <sub>3</sub> NRs/CC                                       | 0.5 M Na <sub>2</sub> SO <sub>4</sub> + 0.1 M NaNO <sub>3</sub>                                      | -0.90                            | ~ 125                                     | 91.2                                                                                            | 69.8                      | Improved ECSAs and electron transport                                                                   | 49   |
| 450°C-Fe <sub>2</sub> O <sub>3</sub> /CC                                    | 0.5 M Na <sub>2</sub> SO <sub>4</sub> + 0.1 M NaNO <sub>3</sub>                                      | -0.96                            | ~ 97.0                                    | 91.2                                                                                            | 84.9                      | Greatest amounts of low valence Fe, enhanced electron transfer to activate NO <sub>3</sub> <sup>-</sup> | 50   |

**Table S3 (Continued).** State-of-the-art NO<sub>x</sub>RR-to-NH<sub>3</sub>/NH<sub>4</sub><sup>+</sup> electrocatalysts.

| Catalyst                                 | Electrolyte                                                                                                   | Potential<br>(V <sub>RHE</sub> ) | Current Density<br>(mA cm <sup>-2</sup> ) | NH <sub>3</sub> /NH <sub>4</sub> <sup>+</sup> Yield<br>(nmol s <sup>-1</sup> cm <sup>-2</sup> ) | FE <sub>NH4+</sub><br>(%) | Key Features                                                                     | Ref. |
|------------------------------------------|---------------------------------------------------------------------------------------------------------------|----------------------------------|-------------------------------------------|-------------------------------------------------------------------------------------------------|---------------------------|----------------------------------------------------------------------------------|------|
| NA-FeOOH/SS                              | 0.1 M PBS + 0.5 M Na <sub>2</sub> SO <sub>4</sub> + 0.2 M NaNO <sub>3</sub>                                   | -0.69                            | ~ 87.0                                    | 11.9                                                                                            | 99.6                      | Fe <sup>2+</sup> active sites                                                    | 51   |
| OVs-FeOOH/CP                             | 0.1 M PBS + 0.1 M NaNO <sub>3</sub>                                                                           | -0.50                            | ~ 12.0                                    | 14.7                                                                                            | 92.0                      | Oxygen vacancies                                                                 | 52   |
| δ-FeOOH                                  | 0.25 M PBS + 500 ppm NO <sub>3</sub> <sup>-</sup> -N                                                          | -1.00                            | ~ 56.0 <sup>(a)</sup>                     | 70.1                                                                                            | 90.2                      | Enhanced hydrogenation ability with NO <sub>x</sub> <sup>*</sup> intermediates   | 53   |
| 3D FeOOH NTA/CC                          | 0.1 M PBS + 0.1 M NaNO <sub>2</sub>                                                                           | -1.00                            | ~ 95.0                                    | 163                                                                                             | 94.7                      | 3D self-standing nanotube array structure, enhanced ECSAs and electron transport | 54   |
| Zero-valent Fe (ZVI)                     | NaOH + 200 mg NO <sub>3</sub> <sup>-</sup> -N/L                                                               | NA                               | NA                                        | NA                                                                                              | NA                        | Fe/Fe <sup>2+</sup> system                                                       | 55   |
| Ti foil                                  | 0.1 M HNO <sub>3</sub> + 0.3 M KNO <sub>3</sub>                                                               | -1.00                            | 22.0 <sup>(a)</sup>                       | NA                                                                                              | 82.0                      | High corrosion resistance                                                        | 56   |
| OVs-TiO <sub>2-x</sub> nanotubes         | 0.5 M Na <sub>2</sub> SO <sub>4</sub> + 50 ppm NO <sub>3</sub> <sup>-</sup> -N (NaNO <sub>3</sub> )           | -0.56                            | NA                                        | 25.0                                                                                            | 85.0                      | Oxygen vacancies                                                                 | 57   |
| OVs-TiO <sub>2-x</sub> NBA/Ti plate      | 0.1 M NaOH + 0.1 M NO <sub>2</sub> <sup>-</sup>                                                               | -0.70                            | ~ 85.0                                    | 129                                                                                             | 92.7                      | Oxygen vacancies                                                                 | 58   |
|                                          | And                                                                                                           |                                  |                                           |                                                                                                 |                           |                                                                                  |      |
|                                          | 0.1 M K <sub>2</sub> SO <sub>4</sub> + 0.1 M NO <sub>2</sub> <sup>-</sup>                                     | -0.50                            | ~ 12.0                                    | 24.5                                                                                            | 92.5                      |                                                                                  |      |
| Ni(OH) <sub>2</sub> @Ni                  | 0.1 M Na <sub>2</sub> SO <sub>4</sub> + 70 mg/L NO <sub>3</sub> <sup>-</sup> -N                               | NA                               | 25.0                                      | NA                                                                                              | 90.4                      | Ni(OH) <sub>2</sub> nanoparticles                                                | 59   |
| V <sub>Ni</sub> -Ni-NSA                  | 0.2 M Na <sub>2</sub> SO <sub>4</sub> + 200 ppm NO <sub>2</sub> <sup>-</sup> -N (200 mg/L NaNO <sub>2</sub> ) | -0.16                            | NA                                        | 68.4                                                                                            | 88.9                      | Ni vacancies                                                                     | 60   |
| MoO <sub>2</sub> /Mo plate               | 0.5 M Na <sub>2</sub> SO <sub>4</sub> + 0.1 M NaNO <sub>2</sub>                                               | -0.80                            | ~ 100                                     | 142                                                                                             | 94.5                      | MoO <sub>2</sub> (111)                                                           | 61   |
| Cu-Pt-180s                               | 12.5 mM Na <sub>2</sub> SO <sub>4</sub> + 30 mg NO <sub>3</sub> <sup>-</sup> -N/L                             | NA                               | 40                                        | NA                                                                                              | ~ 22.0                    | Cu/Pt interfaces synergistic effects                                             | 62   |
| SAC Rh@Cu-0.6% NWs                       | 0.1 M Na <sub>2</sub> SO <sub>4</sub> + 0.1 M KNO <sub>3</sub>                                                | -0.20                            | 162 <sup>(a)</sup>                        | 353                                                                                             | 93.0                      | Synergistic interactions between Rh and Cu sites                                 | 63   |
| Ru-Cu NW <sup>(d)</sup>                  | 1 M KOH + 2000 ppm NO <sub>3</sub> <sup>-</sup>                                                               | -0.017                           | ~ 590 <sup>(a)</sup>                      | ~ 750                                                                                           | 96.0                      | Synergistic interactions between Ru and Cu sites                                 | 64   |
| V <sub>Cu</sub> -Au <sub>1</sub> Cu SAAs | 0.1 M KOH + 7.14 mM NO <sub>3</sub> <sup>-</sup> (KNO <sub>3</sub> )                                          | -0.20                            | ~ 3.00                                    | 9.05                                                                                            | 98.7                      | Electron-deficient Cu surface, Cu vacancies                                      | 65   |
| Strain-defect AuCu@Ag NWs                | 0.1 M KOH + 50 mg/L NO <sub>3</sub> <sup>-</sup> -N                                                           | -0.20                            | NA                                        | 15.9                                                                                            | 96.9                      | Strain                                                                           | 66   |
| PdCu/Cu <sub>2</sub> O                   | 0.5 M Na <sub>2</sub> SO <sub>4</sub> + 100 ppm NO <sub>3</sub> <sup>-</sup> -N (NaNO <sub>3</sub> )          | -0.80                            | NA                                        | 52.8                                                                                            | 94.3                      | Synergistic interactions between electron-deficient Pd and Cu sites              | 67   |

**Table S3 (Continued).** State-of-the-art NO<sub>x</sub>RR-to-NH<sub>3</sub>/NH<sub>4</sub><sup>+</sup> electrocatalysts.

| Catalyst                                                  | Electrolyte                                                                                            | Potential<br>(V <sub>RHE</sub> ) | Current Density<br>(mA cm <sup>-2</sup> ) | NH <sub>3</sub> /NH <sub>4</sub> <sup>+</sup> Yield<br>(nmol s <sup>-1</sup> cm <sup>-2</sup> ) | FE <sub>NH4+</sub><br>(%) | Key Features                                                                                                            | Ref. |
|-----------------------------------------------------------|--------------------------------------------------------------------------------------------------------|----------------------------------|-------------------------------------------|-------------------------------------------------------------------------------------------------|---------------------------|-------------------------------------------------------------------------------------------------------------------------|------|
| Pd-Cu <sub>2</sub> O CEO                                  | 0.5 M K <sub>2</sub> SO <sub>4</sub> +<br>50 ppm KNO <sub>3</sub>                                      | -1.70                            | NA                                        | 15.1                                                                                            | 96.6                      | Corner-etched cavity structure, oxygen vacancies, synergistic interaction between Pd and Cu <sub>2</sub> O active sites | 68   |
| 1D PdCuAg MTs                                             | 0.1 M KOH +<br>10 mM KNO <sub>3</sub>                                                                  | -0.45                            | ~ 25.0                                    | 43.3                                                                                            | 95.2                      | Ample ECSAs, electron-rich surface, nanoconfinement microenvironment                                                    | 69   |
| Cu <sub>2</sub> Pd/CBC                                    | Plasma treated<br>0.5 M KOH                                                                            | -0.10                            | ~ 12.0                                    | ~ 17.1                                                                                          | 93.8                      | Improved adsorption energies                                                                                            | 70   |
| Pd/CuO NOs                                                | 0.1 M K <sub>2</sub> SO <sub>4</sub> +<br>0.01 M KNO <sub>2</sub>                                      | -0.46                            | ~ 18.0                                    | 14.8                                                                                            | 91.8                      | Pd/CuO interfaces, built-in electric field, porous structure                                                            | 71   |
| SAC CuRh <sub>1</sub>                                     | 0.5 M Na <sub>2</sub> SO <sub>4</sub> +<br>0.1 M NaNO <sub>2</sub>                                     | -0.60                            | ~ 80.0                                    | 125                                                                                             | 94.1                      | Synergistic interaction between Rh <sub>1</sub> and Cu sites                                                            | 72   |
| CuCo <sub>2</sub> O <sub>4</sub> /CFs                     | 1 M KOH + 0.1<br>M KNO <sub>3</sub>                                                                    | -0.30                            | ~ 40.0                                    | 43.8                                                                                            | 81.9                      | CuCo <sub>2</sub> O <sub>4</sub> nanoparticles active sites, porous carbon nanofibers substrate                         | 73   |
| OVs-CuCo <sub>2</sub> O <sub>4</sub> /CuO                 | 0.1 M PBS + 0.1<br>M KNO <sub>3</sub>                                                                  | -0.90                            | ~ 120                                     | 153                                                                                             | 95.1                      | Oxygen vacancies                                                                                                        | 74   |
| Cu <sub>1</sub> Co <sub>5</sub>                           | 1 M KOH + 1 M<br>KNO <sub>3</sub>                                                                      | 0.075                            | 453 <sup>(a)</sup>                        | NA                                                                                              | 96.2                      | Synergistic interaction between Co and Cu sites                                                                         | 75   |
| Co <sub>3</sub> O <sub>4</sub> @CuO                       | 0.1 M KOH +<br>0.1 M KNO <sub>2</sub>                                                                  | -0.31                            | ~ 49.0                                    | 75.2                                                                                            | 92.4                      | Synergistic interaction between Co <sub>3</sub> O <sub>4</sub> and CuO sites                                            | 76   |
| Cu <sub>50</sub> Co <sub>50</sub> /Ni foam <sup>(d)</sup> | 1 M KOH + 100<br>mM KNO <sub>3</sub>                                                                   | -0.20                            | 1035                                      | 1333                                                                                            | 100                       | Synergistic interaction between Co and Cu sites                                                                         | 6    |
| NiCo LDH/Cu NW                                            | 1 M KOH +<br>2000 ppm NO <sub>3</sub> <sup>-</sup>                                                     | -0.21                            | 570 <sup>(a)</sup>                        | ~ 653                                                                                           | 94.3                      | Synergistic interaction between Cu and NiCo layered double hydroxide sites                                              | 77   |
| Cu <sub>50</sub> Ni <sub>50</sub> /Cu foam                | 1 M KOH + 0.1<br>M KNO <sub>3</sub>                                                                    | -0.10                            | -90.0                                     | NA                                                                                              | > 95.0                    | Enhanced NO <sub>3</sub> <sup>-</sup> adsorption, shifted d-band centre closer to Fermi level                           | 78   |
| Island-like Cu/Ni foam                                    | 0.5 M Na <sub>2</sub> SO <sub>4</sub> +<br>50 mM KNO <sub>3</sub>                                      | -0.80                            | NA                                        | ~ 97.2                                                                                          | 98.3                      | Cu <sub>2</sub> O active sites, island-like morphology with faults and defects                                          | 79   |
| Janus Cu@Ni                                               | 1 M KOH + 100<br>mM KNO <sub>3</sub>                                                                   | -0.20                            | ~ 31.5                                    | 62.6                                                                                            | 92.5                      | Synergistic interaction between Ni and Cu sites                                                                         | 80   |
| OVs-Cu-Fe <sub>2</sub> O <sub>3</sub> -60/Cu foam         | 0.5 M Na <sub>2</sub> SO <sub>4</sub> +<br>50 ppm NO <sub>3</sub> <sup>-</sup> -N (NaNO <sub>3</sub> ) | -0.60                            | NA                                        | 30.0                                                                                            | 80.1                      | Cu/Fe <sub>2</sub> O <sub>3</sub> interfaces, oxygen vacancies                                                          | 81   |
| Cu-doped Fe <sub>3</sub> O <sub>4</sub> flakes            | 0.1 M KOH +<br>0.1 M KNO <sub>3</sub>                                                                  | -0.60                            | ~ 92.0                                    | 225                                                                                             | ~ 100                     | Altered electronic structure, improved adsorption energies                                                              | 82   |
| Cu@TiO <sub>2</sub> /Ti plate                             | 0.1 M Na <sub>2</sub> SO <sub>4</sub> +<br>0.1 M NaNO <sub>2</sub>                                     | -0.60                            | ~ 85.0                                    | 141                                                                                             | 95.3                      | Cu/TiO <sub>2</sub> interfaces, enhanced charge transfer                                                                | 83   |
| Cu <sub>1</sub> /MnO <sub>2</sub>                         | 0.5 M Na <sub>2</sub> SO <sub>4</sub> +<br>0.1 M NaNO <sub>2</sub>                                     | -0.70                            | ~ 80.0                                    | 122                                                                                             | 93.3                      | Cu single-atom active sites                                                                                             | 84   |

**Table S3 (Continued).** State-of-the-art NO<sub>x</sub>RR-to-NH<sub>3</sub>/NH<sub>4</sub><sup>+</sup> electrocatalysts.

| Catalyst                                                      | Electrolyte                                                          | Potential<br>(V <sub>RHE</sub> ) | Current Density<br>(mA cm <sup>-2</sup> ) | NH <sub>3</sub> /NH <sub>4</sub> <sup>+</sup> Yield<br>(nmol s <sup>-1</sup> cm <sup>-2</sup> ) | FE <sub>NH4+</sub><br>(%) | Key Features                                                                                                  | Ref.           |
|---------------------------------------------------------------|----------------------------------------------------------------------|----------------------------------|-------------------------------------------|-------------------------------------------------------------------------------------------------|---------------------------|---------------------------------------------------------------------------------------------------------------|----------------|
| Ru <sub>15</sub> Co <sub>85</sub> HNDs                        | 0.1 M KNO <sub>3</sub> +<br>0.1 M KOH                                | +0.40                            | NA                                        | 535                                                                                             | 97.0                      | Altered electronic properties, improved NO <sub>3</sub> <sup>-</sup> activation and adsorption                | <sup>10</sup>  |
| RuO <sub>x</sub> -Co <sub>3</sub> O <sub>4</sub>              | 0.1 M Na <sub>2</sub> SO <sub>4</sub> +<br>0.5 M KNO <sub>3</sub>    | -0.60                            | 65.8 <sup>(a)</sup>                       | 58.5                                                                                            | 89.7                      | Synergistic interaction between Co and Ru sites                                                               | <sup>85</sup>  |
| SAC Co <sub>1</sub> Ru                                        | 0.5 M Na <sub>2</sub> SO <sub>4</sub> +<br>0.1 M NaNO <sub>2</sub>   | -0.70                            | ~ 82.0                                    | 132                                                                                             | 94.2                      | Co <sub>1</sub> -Ru heteronuclear active sites                                                                | <sup>86</sup>  |
| Co <sub>3</sub> O <sub>4</sub> /Ni foam                       | 1.0 M NaOH +<br>0.1 M NaNO <sub>3</sub>                              | -0.60                            | ~ 920 <sup>(a)</sup>                      | ~ 1207                                                                                          | 99.3                      | Improved ECSAs and electron transfer channels, electron-deficient Co <sub>3</sub> O <sub>4</sub> active sites | <sup>87</sup>  |
| (Co <sub>0.83</sub> Ni <sub>0.16</sub> ) <sub>2</sub> Fe LDOs | 1 M KOH + 0.1<br>M KNO <sub>3</sub>                                  | -0.42                            | 590 <sup>(a)</sup>                        | 822                                                                                             | 97.8                      | Synergistic interaction between Co and Ni sites                                                               | <sup>88</sup>  |
| Co <sub>3</sub> O <sub>4</sub> /NiO CF                        | 0.5 M Na <sub>2</sub> SO <sub>4</sub> +<br>100 ppm NaNO <sub>2</sub> | -0.59                            | NA                                        | 5.28                                                                                            | 99.4                      | Co <sub>3</sub> O <sub>4</sub> /NiO interfaces                                                                | <sup>89</sup>  |
| Fe-doped Co <sub>3</sub> O <sub>4</sub> NA/TM                 | 0.1 M PBS + 50<br>mM NO <sub>3</sub> <sup>-</sup>                    | -0.70                            | ~10.0                                     | 10.6                                                                                            | 95.5                      | Altered coordination environment, improved conductivity and NO <sub>3</sub> <sup>-</sup> adsorption           | <sup>90</sup>  |
| 3D flower-like ZnCo <sub>2</sub> O <sub>4</sub>               | 0.1 M KOH +<br>0.1 M KNO <sub>3</sub>                                | -0.40                            | ~ 7.00                                    | 8.97                                                                                            | 95.4                      | Improved ECSAs, charge transfer                                                                               | <sup>91</sup>  |
| Co@TiO <sub>2</sub> /TP                                       | 0.1 M PBS + 0.1<br>M NO <sub>3</sub> <sup>-</sup>                    | -0.70                            | ~ 75.0                                    | 103                                                                                             | 96.7                      | Improved ECSAs, Co/TiO <sub>2</sub> interfaces, built-in electric field                                       | <sup>92</sup>  |
| 2000 ppm Ru-Fe <sub>2</sub> O <sub>3</sub>                    | 0.5 M Na <sub>2</sub> SO <sub>4</sub> +<br>0.1 M NaNO <sub>3</sub>   | -0.90                            | ~ 100                                     | 91.4                                                                                            | 72.8                      | Improved hydrogenation                                                                                        | <sup>93</sup>  |
| OVs-0.01Ru-NiMoO <sub>4</sub> /Ni foam                        | 0.5 M Na <sub>2</sub> SO <sub>4</sub> +<br>0.1 M NaNO <sub>2</sub>   | -0.60                            | ~ 180                                     | 280                                                                                             | 95.6                      | Oxygen vacancies                                                                                              | <sup>94</sup>  |
| SAC Ni <sub>1</sub> Ru                                        | 0.5 M Na <sub>2</sub> SO <sub>4</sub> +<br>0.1 M NaNO <sub>2</sub>   | -0.60                            | ~ 85.0                                    | 135                                                                                             | 95.9                      | Optimised electronic structure                                                                                | <sup>95</sup>  |
| Ru-TiO <sub>2</sub> /Ti plate                                 | 0.1 M NaOH +<br>0.1 M NaNO <sub>2</sub>                              | -0.50                            | ~ 180                                     | ~ 283                                                                                           | 98.9                      | Improved electron conductivity and charge transfer                                                            | <sup>96</sup>  |
| Ni@TiO <sub>2</sub> /Ti plate                                 | 0.1 M NaOH +<br>0.1 M NaNO <sub>2</sub>                              | -0.50                            | ~ 90.0                                    | 158                                                                                             | 98.5                      | Schottky junction, Ni/TiO <sub>2</sub> interfaces                                                             | <sup>97</sup>  |
| Ni-TiO <sub>2</sub> /Ti plate                                 | 0.1 M NaOH +<br>0.1 M NaNO <sub>2</sub>                              | -0.50                            | ~ 65.0                                    | 107                                                                                             | 94.9                      | Improved electrical conductivity and adsorption energies                                                      | <sup>98</sup>  |
| Ni foam/Ti plate                                              | 0.1 M PBS + 0.1<br>M NaNO <sub>2</sub>                               | -0.80                            | ~ 132                                     | 206                                                                                             | 95.9                      | 3D porous structure with cauliflower-like morphology, improved ECSAs and electrical conductivity              | <sup>99</sup>  |
| OVs-Zr-TiON                                                   | 0.5 M Na <sub>2</sub> SO <sub>4</sub> +<br>0.05 M KNO <sub>3</sub>   | NA                               | 60.0                                      | 73.7                                                                                            | 94.8                      | Unsaturated Zr sites, oxygen vacancies                                                                        | <sup>100</sup> |
| OVs-Fe <sub>2</sub> TiO <sub>3</sub>                          | PBS + 0.1 M<br>NaNO <sub>3</sub>                                     | -1.0                             | ~ 26.0                                    | 20.3                                                                                            | 87.6                      | Oxygen vacancies                                                                                              | <sup>101</sup> |
|                                                               | And                                                                  |                                  |                                           |                                                                                                 |                           |                                                                                                               |                |
|                                                               | PBS + 0.1 M<br>NaNO <sub>2</sub>                                     | -0.90                            | ~ 25.0                                    | 37.8                                                                                            | 96.1                      |                                                                                                               |                |
| Ag@TiO <sub>2</sub> /Ti plate                                 | 0.1 M NaOH +<br>0.1 M NO <sub>2</sub> <sup>-</sup>                   | -0.50                            | ~ 85.0                                    | 143                                                                                             | 96.4                      | Improved ECSAs                                                                                                | <sup>102</sup> |

**Table S3 (Continued).** State-of-the-art NO<sub>x</sub>RR-to-NH<sub>3</sub>/NH<sub>4</sub><sup>+</sup> electrocatalysts.

| Catalyst                              | Electrolyte                                                        | Potential<br>(V <sub>RHE</sub> ) | Current Density<br>(mA cm <sup>-2</sup> ) | NH <sub>3</sub> /NH <sub>4</sub> <sup>+</sup> Yield<br>(nmol s <sup>-1</sup> cm <sup>-2</sup> ) | FE <sub>NH4+</sub><br>(%) | Key Features                                                               | Ref.           |
|---------------------------------------|--------------------------------------------------------------------|----------------------------------|-------------------------------------------|-------------------------------------------------------------------------------------------------|---------------------------|----------------------------------------------------------------------------|----------------|
| V-TiO <sub>2</sub> /Ti plate          | 0.1 M NaOH +<br>0.1 M NO <sub>2</sub> <sup>-</sup>                 | -0.60                            | ~ 72.0                                    | 116                                                                                             | 93.2                      | Improved electrical conductivity, optimised electronic properties          | <sup>103</sup> |
| Pd-TiO <sub>2</sub> /CC               | 1 M LiCl + 0.25<br>M LiNO <sub>3</sub> <sup>-</sup>                | -0.70                            | 20.0                                      | 17.1                                                                                            | 92.1                      | Altered electronic structure, optimised adsorption energies                | <sup>104</sup> |
| SAC Nb <sub>1</sub> -ZrO <sub>2</sub> | 0.5 M Na <sub>2</sub> SO <sub>4</sub> +<br>0.1 M NaNO <sub>2</sub> | -0.60                            | ~ 87.5                                    | 124                                                                                             | 95.1                      | Synergistic interaction between Nb <sub>1</sub> and ZrO <sub>2</sub> sites | <sup>105</sup> |
| SAC Mo <sub>1</sub> -ZrO <sub>2</sub> | 0.5 M Na <sub>2</sub> SO <sub>4</sub> +<br>0.1 M NaNO <sub>2</sub> | -0.70                            | ~ 60.0                                    | 96.4                                                                                            | 94.8                      | Single atom Mo active sites                                                | <sup>106</sup> |
| Nb-NiO                                | 0.5 M Na <sub>2</sub> SO <sub>4</sub> +<br>0.1 M NaNO <sub>2</sub> | -0.60                            | ~ 28.0                                    | 55.7                                                                                            | 92.4                      | Nb Lewis acid active sites                                                 | <sup>107</sup> |
| Ag@NiO/CC                             | 0.1 M NaOH +<br>0.1 M NaNO <sub>2</sub>                            | -0.40                            | ~ 38.5                                    | 65.2                                                                                            | 97.7                      | Ag (100) active sites                                                      | <sup>108</sup> |

- a- The reported current density reported is partial current density for NH<sub>3</sub>/NH<sub>4</sub><sup>+</sup> production.
- b- The reported current density (or partial) was normalised to ECSAs.
- c- Computational study only.
- d- The NH<sub>3</sub>/NH<sub>4</sub><sup>+</sup> production performance was conducted in a flow cell instead of H-cell.
- e- Abbreviations: (1) FE<sub>NH4+</sub> is Faradaic efficiency for NH<sub>3</sub>/NH<sub>4</sub><sup>+</sup> production.  
(2) Ref. is reference.  
(3) PBS is phosphate buffered saline.

## References

- (1) Li, P. X.; Qu, L.-M.; Zhang, C.-H.; Ren, X.-B.; Wang, H.-X.; Zhang, J.-L.; Mu, Y.-W.; Lü, B.-L. Probing into the Crystal Plane Effect on the Reduction of  $\alpha$ -Fe<sub>2</sub>O<sub>3</sub> in CO by Operando Raman Spectroscopy. *J. Fuel Chem. Technol.* **2021**, *49* (10), 1558–1566. [https://doi.org/10.1016/S1872-5813\(21\)60154-8](https://doi.org/10.1016/S1872-5813(21)60154-8).
- (2) Frankcombe, T. J.; Liu, Y. Interpretation of Oxygen 1s X-Ray Photoelectron Spectroscopy of ZnO. *Chem. Mater.* **2023**, *35* (14), 5468–5474. <https://doi.org/10.1021/acs.chemmater.3c00801>.
- (3) Biesinger, M. C.; Payne, B. P.; Grosvenor, A. P.; Lau, L. W. M.; Gerson, A. R.; Smart, R. S. C. Resolving Surface Chemical States in XPS Analysis of First Row Transition Metals, Oxides and Hydroxides: Cr, Mn, Fe, Co and Ni. *Appl. Surf. Sci.* **2011**, *257* (7), 2717–2730. <https://doi.org/10.1016/j.apsusc.2010.10.051>.
- (4) Fu, Y. Y.; Wang, R. M.; Xu, J.; Chen, J.; Yan, Y.; Narlikar, A. V.; Zhang, H. Synthesis of Large Arrays of Aligned  $\alpha$ -Fe<sub>2</sub>O<sub>3</sub> Nanowires. *Chem. Phys. Lett.* **2003**, *379* (3–4), 373–379. <https://doi.org/10.1016/j.cplett.2003.08.061>.
- (5) Fu, W.; Hu, Z.; Zheng, Y.; Su, P.; Zhang, Q.; Jiao, Y.; Zhou, M. Tuning Mobility of Intermediate and Electron Transfer to Enhance Electrochemical Reduction of Nitrate to Ammonia on Cu<sub>2</sub>O/Cu Interface. *Chem. Eng. J.* **2022**, *433*, 133680. <https://doi.org/10.1016/j.cej.2021.133680>.
- (6) Fang, J.-Y.; Zheng, Q.-Z.; Lou, Y.-Y.; Zhao, K.-M.; Hu, S.-N.; Li, G.; Akdim, O.; Huang, X.-Y.; Sun, S.-G. Ampere-Level Current Density Ammonia Electrochemical Synthesis Using CuCo Nanosheets Simulating Nitrite Reductase Bifunctional Nature. *Nat. Commun.* **2022**, *13* (1), 7899. <https://doi.org/10.1038/s41467-022-35533-6>.
- (7) Chu, K.; Luo, Y.; Shen, P.; Li, X.; Li, Q.; Guo, Y. Unveiling the Synergy of O-Vacancy and Heterostructure over MoO<sub>3-x</sub>/MXene for N<sub>2</sub> Electroreduction to NH<sub>3</sub>. *Adv. Energy Mater.* **2022**, *12* (3), 2103022. <https://doi.org/10.1002/aenm.202103022>.
- (8) Barbosa, A. I.; Costa Lima, S. A.; Reis, S. Application of PH-Responsive Fucoidan/Chitosan Nanoparticles to Improve Oral Quercetin Delivery. *Molecules* **2019**, *24* (2), 346. <https://doi.org/10.3390/molecules24020346>.
- (9) Al-Abduly, A.; Christensen, P. An in Situ and Downstream Study of Non-Thermal Plasma Chemistry in an Air Fed Dielectric Barrier Discharge (DBD). *Plasma Sources Sci. Technol.* **2015**, *24* (6), 065006. <https://doi.org/10.1088/0963-0252/24/6/065006>.
- (10) Han, S.; Li, H.; Li, T.; Chen, F.; Yang, R.; Yu, Y.; Zhang, B. Ultralow Overpotential Nitrate Reduction to Ammonia via a Three-Step Relay Mechanism. *Nat. Catal.* **2023**, *6* (5), 402–414. <https://doi.org/10.1038/s41929-023-00951-2>.
- (11) Alenazi, N.; Hussein, M.; Alamry, K.; Asiri, A. Nanocomposite-Based Aminated Polyethersulfone and Carboxylate Activated Carbon for Environmental Application. A Real Sample Analysis. *J. Carbon Res.* **2018**, *4* (2), 30. <https://doi.org/10.3390/c4020030>.
- (12) Karelin, A. I.; Kayumov, R. R.; Dobrovolsky, Y. A. FTIR Spectroscopic Study of the Interaction between NH<sub>4</sub><sup>+</sup> and DMSO in Nafion. *Spectrochim. Acta Part A Mol. Biomol. Spectrosc.* **2019**, *215*, 381–388. <https://doi.org/10.1016/j.saa.2019.03.007>.
- (13) Verma, S. K.; Deb, M. K. Nondestructive and Rapid Determination of Nitrate in Soil, Dry Deposits and Aerosol Samples Using KBr-Matrix with Diffuse Reflectance Fourier Transform Infrared Spectroscopy (DRIFTS). *Anal. Chim. Acta* **2007**, *582* (2), 382–389. <https://doi.org/10.1016/j.aca.2006.09.020>.
- (14) Lim, M.; Ma, Z.; O'Connell, G.; Yuwono, J. A.; Kumar, P.; Jalili, R.; Amal, R.; Daiyan, R.; Lovell, E. C. Ru-Induced Defect Engineering in Co<sub>3</sub>O<sub>4</sub> Lattice for High Performance Electrochemical Reduction of Nitrate to Ammonium. *Small* **2024**, *20* (33), 2401333. <https://doi.org/10.1002/sml.202401333>.

- (15) Sun, J.; Alam, D.; Daiyan, R.; Masood, H.; Zhang, T.; Zhou, R.; Cullen, P. J.; Lovell, E. C.; Jalili, A.; Amal, R. A Hybrid Plasma Electrocatalytic Process for Sustainable Ammonia Production. *Energy Environ. Sci.* **2021**, *14* (2), 865–872. <https://doi.org/10.1039/d0ee03769a>.
- (16) Ma, Z.; Tsounis, C.; Toe, C. Y.; Kumar, P. V.; Subhash, B.; Xi, S.; Yang, H. Y.; Zhou, S.; Lin, Z.; Wu, K. H.; Wong, R. J.; Thomsen, L.; Bedford, N. M.; Lu, X.; Ng, Y. H.; Han, Z.; Amal, R. Reconstructing Cu Nanoparticle Supported on Vertical Graphene Surfaces via Electrochemical Treatment to Tune the Selectivity of CO<sub>2</sub> Reduction toward Valuable Products. *ACS Catal.* **2022**, *12* (9), 4792–4805. <https://doi.org/10.1021/acscatal.1c05431>.
- (17) Wang, Y.; Li, H.; Zhou, W.; Zhang, X.; Zhang, B.; Yu, Y. Structurally Disordered RuO<sub>2</sub> Nanosheets with Rich Oxygen Vacancies for Enhanced Nitrate Electroreduction to Ammonia. *Angew. Chemie* **2022**, *134* (19), e20220204. <https://doi.org/10.1002/anie.202202604>.
- (18) Li, J.; Zhan, G.; Yang, J.; Quan, F.; Mao, C.; Liu, Y.; Wang, B.; Lei, F.; Li, L.; Chan, A. W. M.; Xu, L.; Shi, Y.; Du, Y.; Hao, W.; Wong, P. K.; Wang, J.; Dou, S.-X.; Zhang, L.; Yu, J. C. Efficient Ammonia Electrosynthesis from Nitrate on Strained Ruthenium Nanoclusters. *J. Am. Chem. Soc.* **2020**, *142* (15), 7036–7046. <https://doi.org/10.1021/jacs.0c00418>.
- (19) Han, Y.; Zhang, X.; Cai, W.; Zhao, H.; Zhang, Y.; Sun, Y.; Hu, Z.; Li, S.; Lai, J.; Wang, L. Facet-Controlled Palladium Nanocrystalline for Enhanced Nitrate Reduction towards Ammonia. *J. Colloid Interface Sci.* **2021**, *600*, 620–628. <https://doi.org/10.1016/j.jcis.2021.05.061>.
- (20) Lim, J.; Liu, C.-Y.; Park, J.; Liu, Y.-H.; Senftle, T. P.; Lee, S. W.; Hatzell, M. C. Structure Sensitivity of Pd Facets for Enhanced Electrochemical Nitrate Reduction to Ammonia. *ACS Catal.* **2021**, *11* (12), 7568–7577. <https://doi.org/10.1021/acscatal.1c01413>.
- (21) Guo, Y.; Cai, X.; Shen, S.; Wang, G.; Zhang, J. Computational Prediction and Experimental Evaluation of Nitrate Reduction to Ammonia on Rhodium. *J. Catal.* **2021**, *402*, 1–9. <https://doi.org/10.1016/j.jcat.2021.08.016>.
- (22) Xiang, J.; Zhao, H.; Chen, K.; Yang, X.; Chu, K. Electrocatalytic Nitrite Reduction to Ammonia on an Rh Single-Atom Catalyst. *J. Colloid Interface Sci.* **2024**, *659* (December 2023), 432–438. <https://doi.org/10.1016/j.jcis.2024.01.013>.
- (23) Liu, H.; Park, J.; Chen, Y.; Qiu, Y.; Cheng, Y.; Srivastava, K.; Gu, S.; Shanks, B. H.; Roling, L. T.; Li, W. Electrocatalytic Nitrate Reduction on Oxide-Derived Silver with Tunable Selectivity to Nitrite and Ammonia. *ACS Catal.* **2021**, *11* (3), 8431–8442. <https://doi.org/10.1021/acscatal.1c01525>.
- (24) Wen, W.; Yan, P.; Sun, W.; Zhou, Y.; Yu, X.-Y. Metastable Phase Cu with Optimized Local Electronic State for Efficient Electrocatalytic Production of Ammonia from Nitrate. *Adv. Funct. Mater.* **2023**, *33* (6), 2212236. <https://doi.org/10.1002/adfm.202212236>.
- (25) Huang, K.; Tang, K.; Wang, M.; Wang, Y.; Jiang, T.; Wu, M. Boosting Nitrate to Ammonia via the Optimization of Key Intermediate Processes by Low-Coordinated Cu–Cu Sites. *Adv. Funct. Mater.* **2024**, *34* (24), 2315324. <https://doi.org/10.1002/adfm.202315324>.
- (26) Zhang, R.; Shang, S.; Wang, F.; Chu, K. Electrocatalytic Reduction of Nitrite to Ammonia on Undercoordinated Cu. *Dalt. Trans.* **2024**, *53* (8), 3470–3475. <https://doi.org/10.1039/d4dt00043a>.
- (27) Zhou, N.; Wang, Z.; Zhang, N.; Bao, D.; Zhong, H.; Zhang, X. Potential-Induced Synthesis and Structural Identification of Oxide-Derived Cu Electrocatalysts for Selective Nitrate Reduction to Ammonia. *ACS Catal.* **2023**, *13* (11), 7529–7537. <https://doi.org/10.1021/acscatal.3c01315>.
- (28) Yuan, J.; Xing, Z.; Tang, Y.; Liu, C. Tuning the Oxidation State of Cu Electrodes for Selective Electrosynthesis of Ammonia from Nitrate. *ACS Appl. Mater. Interfaces* **2021**, *13* (44), 52469–52478. <https://doi.org/10.1021/acsami.1c10946>.
- (29) Wu, K.; Sun, C.; Wang, Z.; Song, Q.; Bai, X.; Yu, X.; Li, Q.; Wang, Z.; Zhang, H.; Zhang, J.; Tong, X.; Liang, Y.; Khosla, A.; Zhao, Z. Surface Reconstruction on Uniform Cu Nanodisks Boosted Electrochemical Nitrate Reduction to Ammonia. *ACS Mater. Lett.* **2022**, *4* (4), 650–656.

<https://doi.org/10.1021/acsmaterialslett.2c00149>.

- (30) Kim, Y.; Ko, J.; Shim, M.; Park, J.; Shin, H.-H.; Kim, Z. H.; Jung, Y.; Byon, H. R. Identifying the Active Sites and Intermediates on Copper Surfaces for Electrochemical Nitrate Reduction to Ammonia. *Chem. Sci.* **2024**, *15* (7), 2578–2585. <https://doi.org/10.1039/d3sc05793c>.
- (31) Fang, L.; Wang, S.; Song, C.; Lu, S.; Yang, X.; Qi, X.; Liu, H. Boosting Nitrate Electroreduction to Ammonia via in Situ Generated Stacking Faults in Oxide-Derived Copper. *Chem. Eng. J.* **2022**, *446*, 137341. <https://doi.org/10.1016/j.cej.2022.137341>.
- (32) Bai, L.; Franco, F.; Timoshenko, J.; Rettenmaier, C.; Scholten, F.; Jeon, H. S.; Yoon, A.; Rüscher, M.; Herzog, A.; Haase, F. T.; Kühl, S.; Chee, S. W.; Bergmann, A.; Beatriz, R. C. Electrocatalytic Nitrate and Nitrite Reduction toward Ammonia Using Cu<sub>2</sub>O Nanocubes: Active Species and Reaction Mechanisms. *J. Am. Chem. Soc.* **2024**, *146* (14), 9665–9678. <https://doi.org/10.1021/jacs.3c13288>.
- (33) Wang, Y.; Zhou, W.; Jia, R.; Yu, Y.; Zhang, B. Unveiling the Activity Origin of a Copper-Based Electrocatalyst for Selective Nitrate Reduction to Ammonia. *Angew. Chemie Int. Ed.* **2020**, *59* (13), 5350–5354. <https://doi.org/10.1002/anie.201915992>.
- (34) Ma, A.; Wu, X.; Li, X.; Dewi Susanti, Y.; Liu, D.; Li, H.; Kuvarega, A. T.; Mamba, B. B.; Gui, J. Electrocatalytic Nitrate Reduction to Ammonia over Cu/Cu<sub>2</sub>O Catalysts with Controllable Ratios. *Appl. Surf. Sci.* **2024**, *653*, 159397. <https://doi.org/10.1016/j.apsusc.2024.159397>.
- (35) Shi, Y.; Li, Y.; Li, R.; Zhao, X.; Yu, Y.; Yang, M. In-Situ Reconstructed Cu/Cu<sub>2</sub>O Heterogeneous Nanorods with Oxygen Vacancies for Enhanced Electrocatalytic Nitrate Reduction to Ammonia. *Chem. Eng. J.* **2024**, *479*, 147574. <https://doi.org/10.1016/j.cej.2023.147574>.
- (36) Geng, J.; Ji, S. Boosting Electrocatalytic Nitrate Reduction to Ammonia via Cu<sub>2</sub>O/Cu(OH)<sub>2</sub> Heterostructures Promoting Electron Transfer. *Nano Res.* **2024**, *17* (6), 4898–4907. <https://doi.org/10.1007/s12274-024-6480-1>.
- (37) Daiyan, R.; Tran-Phu, T.; Kumar, P.; Iputera, K.; Tong, Z.; Leverett, J.; Khan, M. H. A.; Asghar Esmailpour, A.; Jalili, A.; Lim, M.; Tricoli, A.; Liu, R.-S.; Lu, X.; Lovell, E.; Amal, R. Nitrate Reduction to Ammonium: From CuO Defect Engineering to Waste NO<sub>x</sub>-to-NH<sub>3</sub> Economic Feasibility. *Energy Environ. Sci.* **2021**, *14* (6), 3588–3598. <https://doi.org/10.1039/d1ee00594d>.
- (38) Chen, Q.; An, X.; Liu, Q.; Wu, X.; Xie, L.; Zhang, J.; Yao, W.; Hamdy, M. S.; Kong, Q.; Sun, X. Boosting Electrochemical Nitrite-Ammonia Conversion Properties by a Cu Foam@Cu<sub>2</sub>O Catalyst. *Chem. Commun.* **2022**, *58* (4), 517–520. <https://doi.org/10.1039/d1cc06215h>.
- (39) Xu, Y.; Wang, M.; Ren, K.; Ren, T.; Liu, M.; Wang, Z.; Li, X.; Wang, L.; Wang, H. Atomic Defects in Pothole-Rich Two-Dimensional Copper Nanoplates Triggering Enhanced Electrocatalytic Selective Nitrate-to-Ammonia Transformation. *J. Mater. Chem. A* **2021**, *9* (30), 16411–16417. <https://doi.org/10.1039/d1ta04743d>.
- (40) Zhao, Y.; Liu, Y.; Zhang, Z.; Mo, Z.; Wang, C.; Gao, S. Flower-like Open-Structured Polycrystalline Copper with Synergistic Multi-Crystal Plane for Efficient Electrocatalytic Reduction of Nitrate to Ammonia. *Nano Energy* **2022**, *97*, 107124. <https://doi.org/10.1016/j.nanoen.2022.107124>.
- (41) Zhao, H.; Xiang, J.; Sun, Z.; Shang, S.; Chu, K. Electroreduction of Nitrite to Ammonia over a Cobalt Single-Atom Catalyst. *ACS Sustain. Chem. Eng.* **2024**, *12* (7), 2783–2789. <https://doi.org/10.1021/acssuschemeng.3c07388>.
- (42) Wu, Q.; Zhu, W.; Ma, D.; Liang, C.; Wang, Z.; Liang, H. Screening of Transition Metal Oxides for Electrocatalytic Nitrate Reduction to Ammonia at Large Currents. *Nano Res.* **2024**, *17* (5), 3902–3910.
- (43) Deng, X.; Yang, Y.; Wang, L.; Fu, X.-Z.; Luo, J.-L. Metallic Co Nanoarray Catalyzes Selective NH<sub>3</sub> Production from Electrochemical Nitrate Reduction at Current Densities Exceeding 2 A Cm<sup>-2</sup>. *Adv. Sci.* **2021**, *8* (7), 2004523. <https://doi.org/10.1002/advs.202004523>.
- (44) Yu, Y.; Wang, C.; Yu, Y.; Wang, Y.; Zhang, B. Promoting Selective Electroreduction of Nitrates to

Ammonia over Electron-Deficient Co Modulated by Rectifying Schottky Contacts. *Sci. China Chem.* **2020**, *63* (10), 1469–1476. <https://doi.org/10.1007/s11426-020-9795-x>.

- (45) Zhao, F.; Hai, G.; Li, X.; Jiang, Z.; Wang, H. Enhanced Electrocatalytic Nitrate Reduction to Ammonia on Cobalt Oxide Nanosheets via Multiscale Defect Modulation. *Chem. Eng. J.* **2023**, *461*, 141960. <https://doi.org/10.1016/j.cej.2023.141960>.
- (46) Shi, S.-S.; Yuan, Z.-X.; Zhang, F.; Chen, P. A Co<sub>3</sub>O<sub>4</sub>-x/Co Nanocomposite with Synergistically Enhanced Electrochemical Activity for Reduction of Nitrite to Ammonia. *Electrochim. Acta* **2024**, *473*, 143455. <https://doi.org/10.1016/j.electacta.2023.143455>.
- (47) Deng, Z.; Ma, C.; Li, Z.; Luo, Y.; Zhang, L.; Sun, S.; Liu, Q.; Du, J.; Lu, Q.; Zheng, B.; Sun, X. High-Efficiency Electrochemical Nitrate Reduction to Ammonia on a Co<sub>3</sub>O<sub>4</sub> Nanoarray Catalyst with Cobalt Vacancies. *ACS Appl. Mater. Interfaces* **2022**, *14* (41), 46595–46602. <https://doi.org/10.1021/acsami.2c12772>.
- (48) Wu, Z.-Y.; Karamad, M.; Yong, X.; Huang, Q.; Cullen, D. A.; Zhu, P.; Xia, C.; Xiao, Q.; Shakouri, M.; Chen, F.-Y.; Kim, J. Y. (Timothy); Xia, Y.; Heck, K.; Hu, Y.; Wong, M. S.; Li, Q.; Gates, I.; Siahrostami, S.; Wang, H. Electrochemical Ammonia Synthesis via Nitrate Reduction on Fe Single Atom Catalyst. *Nat. Commun.* **2021**, *12* (1), 2870. <https://doi.org/10.1038/s41467-021-23115-x>.
- (49) Li, T.; Tang, C.; Guo, H.; Wu, H.; Duan, C.; Wang, H.; Zhang, F.; Cao, Y.; Yang, G.; Zhou, Y. In Situ Growth of Fe<sub>2</sub>O<sub>3</sub> Nanorod Arrays on Carbon Cloth with Rapid Charge Transfer for Efficient Nitrate Electroreduction to Ammonia. *ACS Appl. Mater. Interfaces* **2022**, *14* (44), 49765–49773. <https://doi.org/10.1021/acsami.2c14215>.
- (50) Li, T.; Tang, C.; Guo, H.; Yang, J.; Zhang, F.; Yang, G.; Zhou, Y. Understanding First Electron Transfer Kinetic Process of Electrochemical Nitrate Reduction to Ammonia on Fe<sub>2</sub>O<sub>3</sub> Nanorods Array. *Chem. Eng. J.* **2024**, *485*, 149560. <https://doi.org/10.1016/j.cej.2024.149560>.
- (51) Liu, C.; Zhang, G.; Zhang, W.; Gu, Z.; Zhu, G. Specifically Adsorbed Ferrous Ions Modulate Interfacial Affinity for High-Rate Ammonia Electrosynthesis from Nitrate in Neutral Media. *Proc. Natl. Acad. Sci.* **2023**, *120* (3), e2209979120. <https://doi.org/10.1073/pnas>.
- (52) Liu, Q.; Liu, Q.; Xie, L.; Ji, Y.; Li, T.; Zhang, B.; Li, N.; Tang, B.; Liu, Y.; Gao, S.; Luo, Y.; Yu, L.; Kong, Q.; Sun, X. High-Performance Electrochemical Nitrate Reduction to Ammonia under Ambient Conditions Using a FeOOH Nanorod Catalyst. *ACS Appl. Mater. Interfaces* **2022**, *14* (15), 17312–17318. <https://doi.org/10.1021/acsami.2c00436>.
- (53) Qu, K.; Zhu, X.; Zhang, Y.; Song, L.; Wang, J.; Gong, Y.; Liu, X.; Wang, A.-L. Enhancing Nitrate Reduction to Ammonia Through Crystal Phase Engineering: Unveiling the Hydrogen Bonding Effect in  $\delta$ -FeOOH Electrocatalysis. *Small* **2024**, *20* (31), 2401327. <https://doi.org/10.1002/sml.202401327>.
- (54) Liu, Q.; Liu, Q.; Xie, L.; Yue, L.; Li, T.; Luo, Y.; Li, N.; Tang, B.; Yu, L.; Sun, X. A 3D FeOOH Nanotube Array: An Efficient Catalyst for Ammonia Electrosynthesis by Nitrite Reduction. *Chem. Commun.* **2022**, *58* (33), 5160–5163. <https://doi.org/10.1039/d2cc00611a>.
- (55) Xiang, H.; Liu, W.; Su, L.; Chen, S.; Han, Y.; Zhu, C.; Wang, S.; Tan, C.; Zhang, L. Nitrate Reduction to Ammonia in Fe/Fe<sup>2+</sup> System: A Case Study on the Mechanism of Green Rust Generation. *Sep. Purif. Technol.* **2024**, *330*, 125357. <https://doi.org/10.1016/j.seppur.2023.125357>.
- (56) McEnaney, J. M.; Blair, S. J.; Nielander, A. C.; Schwalbe, J. A.; Koshy, D. M.; Cargnello, M.; Jaramillo, T. F. Electrolyte Engineering for Efficient Electrochemical Nitrate Reduction to Ammonia on a Titanium Electrode. *ACS Sustain. Chem. Eng.* **2020**, *8* (7), 2672–2681. <https://doi.org/10.1021/acssuschemeng.9b05983>.
- (57) Jia, R.; Wang, Y.; Wang, C.; Ling, Y.; Yu, Y.; Zhang, B. Boosting Selective Nitrate Electroreduction to Ammonium by Constructing Oxygen Vacancies in TiO<sub>2</sub>. *ACS Catal.* **2020**, *10* (6), 3533–3540. <https://doi.org/10.1021/acscatal.9b05260>.
- (58) Zhao, D.; Liang, J.; Li, J.; Zhang, L.; Dong, K.; Yue, L.; Luo, Y.; Ren, Y.; Liu, Q.; Hamdy, M. S.; Li,

- Q.; Kong, Q.; Sun, X. A TiO<sub>2-x</sub> Nanobelt Array with Oxygen Vacancies: An Efficient Electrocatalyst toward Nitrite Conversion to Ammonia. *Chem. Commun.* **2022**, 58 (22), 3669–3672. <https://doi.org/10.1039/d2cc00856d>.
- (59) Zheng, W.; Zhu, L.; Yan, Z.; Lin, Z.; Lei, Z.; Zhang, Y.; Xu, H.; Dang, Z.; Wei, C.; Feng, C. Self-Activated Ni Cathode for Electrocatalytic Nitrate Reduction to Ammonia: From Fundamentals to Scale-Up for Treatment of Industrial Wastewater. *Environ. Sci. Technol.* **2021**, 55 (19), 13231–13243. <https://doi.org/10.1021/acs.est.1c02278>.
- (60) Wang, C.; Zhou, W.; Sun, Z.; Wang, Y.; Zhang, B.; Yu, Y. Integrated Selective Nitrite Reduction to Ammonia with Tetrahydroisoquinoline Semi-Dehydrogenation over a Vacancy-Rich Ni Bifunctional Electrode. *J. Mater. Chem. A* **2021**, 9 (1), 239–243. <https://doi.org/10.1039/d0ta09590g>.
- (61) Wang, G.; Chen, Q.; An, X.; Liu, Q.; Xie, L.; Zhang, J.; Yao, W.; Liu, X.; Sun, S.; Sun, X.; Kong, Q. Ambient Ammonia Production via Electrocatalytic Nitrite Reduction over MoO<sub>2</sub> Nanoparticles Self-Supported on Molybdenum Plate. *Colloids Surfaces A Physicochem. Eng. Asp.* **2023**, 657, 130549. <https://doi.org/10.1016/j.colsurfa.2022.130549>.
- (62) Cerrón-Calle, G. A.; Fajardo, A. S.; Sánchez-Sánchez, C. M.; Garcia-Segura, S. Highly Reactive Cu-Pt Bimetallic 3D-Electrocatalyst for Selective Nitrate Reduction to Ammonia. *Appl. Catal. B Environ.* **2022**, 302, 120844. <https://doi.org/10.1016/j.apcatb.2021.120844>.
- (63) Liu, H.; Lang, X.; Zhu, C.; Timoshenko, J.; Ruscher, M.; Bai, L.; Guijarro, N.; Yin, H.; Peng, Y.; Li, J.; Liu, Z.; Wang, W.; Cuenya, B. R.; Luo, J. Efficient Electrochemical Nitrate Reduction to Ammonia with Copper-Supported Rhodium Cluster and Single-Atom Catalysts. *Angew. Chemie Int. Ed.* **2022**, 61 (23), e202202556.
- (64) Chen, F.-Y.; Wu, Z.-Y.; Gupta, S.; Rivera, D. J.; Lambeets, S. V.; Pecaut, S.; Kim, J. Y. T.; Zhu, P.; Finckel, Y. Z.; Meira, D. M.; King, G.; Gao, G.; Xu, W.; Cullen, D. A.; Zhou, H.; Han, Y.; Perea, D. E.; Muhich, C. L.; Wang, H. Efficient Conversion of Low-Concentration Nitrate Sources into Ammonia on a Ru-Dispersed Cu Nanowire Electrocatalyst. *Nat. Nanotechnol.* **2022**, 17 (7), 759–767. <https://doi.org/10.1038/s41565-022-01121-4>.
- (65) Zhang, Y.; Chen, X.; Wang, W.; Yin, L.; Crittenden, J. C. Electrocatalytic Nitrate Reduction to Ammonia on Defective Au<sub>1</sub>Cu (111) Single-Atom Alloys. *Appl. Catal. B Environ.* **2022**, 310, 121346. <https://doi.org/10.1016/j.apcatb.2022.121346>.
- (66) Liu, S.; Miao, W.; Ma, K.; Teng, H.; Zhang, X.; Li, J.; Li, W.; Cui, X.; Jiang, L. Defect-Rich AuCu@Ag Nanowires with Exclusive Strain Effect Accelerate Nitrate Reduction to Ammonia. *Appl. Catal. B Environ. Energy* **2024**, 350, 123919. <https://doi.org/10.1016/j.apcatb.2024.123919>.
- (67) Yin, H.; Chen, Z.; Xiong, S.; Chen, J.; Wang, C.; Wang, R.; Kuwahara, Y.; Luo, J.; Yamashita, H.; Peng, Y.; Li, J. Alloying Effect-Induced Electron Polarization Drives Nitrate Electroreduction to Ammonia. *Chem Catal.* **2021**, 1 (5), 1088–1103. <https://doi.org/10.1016/j.cheecat.2021.08.014>.
- (68) Xu, Y.; Ren, K.; Ren, T.; Wang, M.; Wang, Z.; Li, X.; Wang, L.; Wang, H. Ultralow-Content Pd in-Situ Incorporation Mediated Hierarchical Defects in Corner-Etched Cu<sub>2</sub>O Octahedra for Enhanced Electrocatalytic Nitrate Reduction to Ammonia. *Appl. Catal. B Environ.* **2022**, 306, 121094. <https://doi.org/10.1016/j.apcatb.2022.121094>.
- (69) Sun, L.; Yao, H.; Wang, Y.; Zheng, C.; Liu, B. Mesoporous Engineering to Promote Selective Nitrate-to-Ammonia Electroreduction. *Adv. Energy Mater.* **2023**, 13 (44), 2303054. <https://doi.org/10.1002/aenm.202303054>.
- (70) Li, W.; Zhang, S.; Ding, J.; Liu, J.; Wang, Z.; Zhang, H.; Ding, J.; Chen, L.; Liang, C. Sustainable Nitrogen Fixation to Produce Ammonia by Electroreduction of Plasma-Generated Nitrite. *ACS Sustain. Chem. Eng.* **2023**, 11 (3), 1168–1177. <https://doi.org/10.1021/acssuschemeng.2c06525>.
- (71) Liu, S.; Cui, L.; Yin, S.; Ren, H.; Wang, Z.; Xu, Y.; Li, X.; Wang, L.; Wang, H. Heterointerface-Triggered Electronic Structure Reformation: Pd/CuO Nano-Olives Motivate Nitrite Electroreduction to Ammonia. *Appl. Catal. B Environ.* **2022**, 319, 121876.

<https://doi.org/10.1016/j.apcatb.2022.121876>.

- (72) Xiang, J.; Qiang, C.; Shang, S.; Chen, K.; Kang, C.; Chu, K. Tandem Electrocatalytic Reduction of Nitrite to Ammonia on Rhodium–Copper Single Atom Alloys. *Adv. Funct. Mater.* **2024**, *34* (36), 2401941. <https://doi.org/10.1002/adfm.202401941>.
- (73) Niu, Z.; Fan, S.; Li, X.; Wang, P.; Liu, Z.; Wang, J.; Bai, C.; Zhang, D. Bifunctional Copper-Cobalt Spinel Electrocatalysts for Efficient Tandem-like Nitrate Reduction to Ammonia. *Chem. Eng. J.* **2022**, *450*, 138343. <https://doi.org/10.1016/j.cej.2022.138343>.
- (74) Liu, X.; Cheng, X.; Zhao, H.; Liu, P.; Wang, Y.-Q. CuCo<sub>2</sub>O<sub>4</sub>/CuO Heterostructure with Oxygen Vacancies Induced by Plasma for Electrocatalytic Nitrate Reduction to Ammonia. *Inorg. Chem.* **2024**, *63* (30), 14093–14102. <https://doi.org/10.1021/acs.inorgchem.4c01924>.
- (75) Zhou, Y.; Duan, R.; Li, H.; Zhao, M.; Ding, C.; Li, C. Boosting Electrocatalytic Nitrate Reduction to Ammonia via Promoting Water Dissociation. *ACS Catal.* **2023**, *13* (16), 10846–10854. <https://doi.org/10.1021/acscatal.3c02951>.
- (76) Zhou, Y.; Meng, Y.; Wang, X.; Luo, J.; Xia, H.; Li, W.; Zhang, J. Enhancing Electro-Reduction of Nitrite to Ammonia by Loading Co<sub>3</sub>O<sub>4</sub> on CuO to Construct Electrocatalytic Dual-Sites. *Dalt. Trans.* **2023**, *52* (11), 3260–3264. <https://doi.org/10.1039/d2dt03720c>.
- (77) Zhang, X.; Liu, X.; Huang, Z.-F.; Guo, L.; Gan, L.; Zhang, S.; Ajmal, M.; Pan, L.; Shi, C.; Zhang, X.; Yang, G.; Zou, J.-J. Tandem Nitrate Electroreduction to Ammonia with Industrial-Level Current Density on Hierarchical Cu Nanowires Shelled with NiCo-Layered Double Hydroxide. *ACS Catal.* **2023**, *13* (22), 14670–14679. <https://doi.org/10.1021/acscatal.3c04541>.
- (78) Wang, Y.; Xu, A.; Wang, Z.; Huang, L.; Li, J.; Li, F.; Wicks, J.; Luo, M.; Nam, D.-H.; Tan, C.-S.; Ding, Y.; Wu, J.; Lum, Y.; Dinh, C.-T.; Sinton, D.; Zheng, G.; Sargent, E. H. Enhanced Nitrate-to-Ammonia Activity on Copper-Nickel Alloys via Tuning of Intermediate Adsorption. *J. Am. Chem. Soc.* **2020**, *142* (12), 5702–5708. <https://doi.org/10.1021/jacs.9b13347>.
- (79) Wang, C.; Ye, F.; Shen, J.; Xue, K.-H.; Zhu, Y.; Li, C. In Situ Loading of Cu<sub>2</sub>O Active Sites on Island-like Copper for Efficient Electrochemical Reduction of Nitrate to Ammonia. *ACS Appl. Mater. Interfaces* **2022**, *14* (5), 6680–6688. <https://doi.org/10.1021/acsaami.1c21691>.
- (80) Lou, Y.-Y.; Zheng, Q.-Z.; Zhou, S.-Y.; Fang, J.-Y.; Akdim, O.; Ding, X.-Y.; Oh, R.; Park, G.-S.; Huang, X.; Sun, S.-G. Phase-Dependent Electrocatalytic Nitrate Reduction to Ammonia on Janus Cu@Ni Tandem Catalyst. *ACS Catal.* **2024**, *14* (7), 5098–5108. <https://doi.org/10.1021/acscatal.4c00479>.
- (81) Gao, Y.; Huang, K.; Yan, C.; Li, S.; Zhang, H.; Cheng, L.; Huang, F. Interfacial Engineering of Cu-Fe<sub>2</sub>O<sub>3</sub> Nanotube Arrays with Built-in Electric Field and Oxygen Vacancies for Boosting the Electrocatalytic Reduction of Nitrates. *Mater. Adv.* **2022**, *3* (18), 7107–7115. <https://doi.org/10.1039/d2ma00685e>.
- (82) Wang, J.; Wang, Y.; Cai, C.; Liu, Y.; Wu, D.; Wang, M.; Li, M.; Wei, X.; Shao, M.; Gu, M. Cu-Doped Iron Oxide for the Efficient Electrocatalytic Nitrate Reduction Reaction. *Nano Lett.* **2023**, *23* (5), 1897–1903. <https://doi.org/10.1021/acs.nanolett.2c04949>.
- (83) Ouyang, L.; Fan, X.; Li, Z.; He, X.; Sun, S.; Cai, Z.; Luo, Y.; Zheng, D.; Ying, B.; Zhang, J.; Alshehri, A. A.; Wang, Y.; Ma, K.; Sun, X. High-Efficiency Electroreduction of Nitrite to Ammonia on a Cu@TiO<sub>2</sub> Nanobelt Array. *Chem. Commun.* **2023**, *59* (12), 1625–1628. <https://doi.org/10.1039/d2cc06261e>.
- (84) Wan, Y.; Du, W.; Chen, K.; Zhang, N.; Chu, K. Electrocatalytic Nitrite-to-Ammonia Reduction on Isolated Cu Sites. *J. Colloid Interface Sci.* **2023**, *652*, 2180–2185. <https://doi.org/10.1016/j.jcis.2023.09.071>.
- (85) Liu, Y.; Jiang, X.; Zhang, Y.; Li, H.; Huang, W.; Yang, Y.; Ye, M.; Liu, Y. The Interface-Mediated Electron Structure Tuning of RuOx-Co<sub>3</sub>O<sub>4</sub> Nano-Particles for Efficient Electrocatalytic Nitrate

- Reduction. *Dalt. Trans.* **2024**, 53 (1), 162–170. <https://doi.org/10.1039/d3dt03318j>.
- (86) Wang, F.; Xiang, J.; Zhang, G.; Chen, K.; Chu, K. Single-Atom Co Alloyed Ru for Electrocatalytic Nitrite Reduction to Ammonia. *Nano Res.* **2024**, 17 (5), 3660–3666. <https://doi.org/10.1007/s12274-023-6261-2>.
- (87) Zhao, D.; Yao, J.; Ma, C.; Wang, A.; Xie, H.; Zhao, J.; Yan, J.; Zhu, K.; Zhu, Y.; Cao, D.; Wang, G. 3D Integrated Non-Noble Metal Oxides Nano Arrays for Enhanced Nitrate Electroreduction to Ammonia. *J. Power Sources* **2024**, 592, 233945. <https://doi.org/10.1016/j.jpowsour.2023.233945>.
- (88) Yang, Q.; Bu, Y.; Pu, S.; Chu, L.; Huang, W.; Zhu, X.; Liu, C.; Fang, G.; Cui, P.; Zhou, D.; Wang, Y. Matched Kinetics Process Over Fe<sub>2</sub>O<sub>3</sub>-Co/NiO Heterostructure Enables Highly Efficient Nitrate Electroreduction to Ammonia. *Angew. Chemie Int. Ed.* **2024**, 63 (15), e202400428. <https://doi.org/10.1002/anie.202400428>.
- (89) Begildayeva, T.; Theerthagiri, J.; Min, A.; Moon, C. J.; Choi, M. Y. Electrocatalytic Ammonia Production from Nitrite via Dual-Site Co<sub>3</sub>O<sub>4</sub>/NiO Catalysts Derived from Laser-Induced Cyanonickelate Frameworks. *Chem. Eng. J.* **2024**, 485, 150041. <https://doi.org/10.1016/j.cej.2024.150041>.
- (90) Wei, P.; Liang, J.; Liu, Q.; Xie, L.; Tong, X.; Ren, Y.; Li, T.; Luo, Y.; Li, N.; Tang, B.; Asiri, A. M.; Hamdy, M. S.; Kong, Q.; Wang, Z.; Sun, X. Iron-Doped Cobalt Oxide Nanoarray for Efficient Electrocatalytic Nitrate-to-Ammonia Conversion. *J. Colloid Interface Sci.* **2022**, 615, 636–642. <https://doi.org/10.1016/j.jcis.2022.01.186>.
- (91) Huang, P.; Fan, T.; Ma, X.; Zhang, J.; Zhang, Y.; Chen, Z.; Yi, X. 3D Flower-Like Zinc Cobaltite for Electrocatalytic Reduction of Nitrate to Ammonia under Ambient Conditions. *ChemSusChem* **2022**, 15 (4), e202102049. <https://doi.org/10.1002/cssc.202102049>.
- (92) Fan, X.; Zhao, D.; Deng, Z.; Zhang, L.; Li, J.; Li, Z.; Sun, S.; Luo, Y.; Zheng, D.; Wang, Y.; Ying, B.; Zhang, J.; Alshehri, A. A.; Lin, Y.; Tang, C.; Sun, X.; Zheng, Y. Constructing Co@TiO<sub>2</sub> Nanoarray Heterostructure with Schottky Contact for Selective Electrocatalytic Nitrate Reduction to Ammonia. *Small* **2023**, 19 (17), 2208036. <https://doi.org/10.1002/sml.202208036>.
- (93) Luo, S.; Guo, H.; Li, T.; Wu, H.; Zhang, F.; Tang, C.; Chen, G.; Yang, G.; Zhou, Y. Ruthenium-Induced Hydrolysis Effect on Fe<sub>2</sub>O<sub>3</sub> Nanoarrays for High-Performance Electrochemical Nitrate Reduction to Ammonia. *Appl. Catal. B Environ. Energy* **2024**, 351, 123967. <https://doi.org/10.1016/j.apcatb.2024.123967>.
- (94) Wang, G.; Chen, Q.; Zhang, J.; An, X.; Liu, Q.; Xie, L.; Yao, W.; Sun, X.; Kong, Q. Ru Doped NiMoO<sub>4</sub> Nanoarray as a High-Efficiency Electrocatalyst for Nitrite Reduction to Ammonia. *J. Colloid Interface Sci.* **2024**, 661, 401–408. <https://doi.org/10.1016/j.jcis.2024.01.195>.
- (95) Wang, F.; Zhao, H.; Zhang, G.; Zhang, H.; Han, X.; Chu, K. Electroreduction of Nitrite to Ammonia Over Ni<sub>1</sub>Ru Single-Atom Alloys. *Adv. Funct. Mater.* **2024**, 34 (3), 2308072. <https://doi.org/10.1002/adfm.202308072>.
- (96) Ren, Y.; Zhou, Q.; Li, J.; He, X.; Fan, X.; Fu, Y.; Fang, X.; Cai, Z.; Sun, S.; Hamdy, M. S.; Zhang, J.; Gong, F.; Liu, Y.; Sun, X. Ruthenium Doping: An Effective Strategy for Boosting Nitrite Electroreduction to Ammonia over Titanium Dioxide Nanoribbon Array. *J. Colloid Interface Sci.* **2023**, 645, 806–812. <https://doi.org/10.1016/j.jcis.2023.05.020>.
- (97) Ji, X.; Ma, C.; Zhang, F.; He, X.; Fan, X.; Li, J.; Li, Z.; Ouyang, L.; Zhang, L.; Li, T.; Zhao, D.; Wang, Y.; Zhang, J.; Cai, Z.; Sun, S.; Alshehri, A. A.; Lu, Q.; Sun, X. Ni@TiO<sub>2</sub> Nanoarray with the Schottky Junction for the Highly Selective Electrochemical Reduction of Nitrite to Ammonia. *ACS Sustain. Chem. Eng.* **2023**, 11 (7), 2686–2691. <https://doi.org/10.1021/acssuschemeng.2c06620>.
- (98) Cai, Z.; Ma, C.; Zhao, D.; Fan, X.; Li, R.; Zhang, L.; Li, J.; He, X.; Luo, Y.; Zheng, D.; Wang, Y.; Ying, B.; Sun, S.; Xu, J.; Lu, Q.; Sun, X. Ni Doping Enabled Improvement in Electrocatalytic Nitrite-to-Ammonia Conversion over TiO<sub>2</sub> Nanoribbon. *Mater. Today Energy* **2023**, 31, 101220. <https://doi.org/10.1016/j.mtener.2022.101220>.

- (99) Li, Y.; He, X.; Chen, J.; Fan, X.; Yao, Y.; Ouyang, L.; Luo, Y.; Liu, Q.; Sun, S.; Cai, Z.; Alfaifi, S.; Du, J.; Zheng, B.; Sun, X. 3D Cauliflower-like Ni Foam: A High-Efficiency Electrocatalyst for Ammonia Production via Nitrite Reduction. *Chem. Commun.* **2023**, *59* (72), 10805–10808. <https://doi.org/10.1039/d3cc03121g>.
- (100) Yang, L.; Wang, C.; Li, Y.; Ge, W.; Tang, L.; Shen, J.; Zhu, Y.; Li, C. Frustrated Lewis Pairs on Zr Single Atoms Supported N-Doped TiO<sub>2-x</sub> Catalysts for Electrochemical Nitrate Reduction To Ammonia. *Adv. Funct. Mater.* **2024**, *34* (36), 2401094. <https://doi.org/10.1002/adfm.202401094>.
- (101) Du, H.; Guo, H.; Wang, K.; Du, X.; Beshiwork, B. A.; Sun, S.; Luo, Y.; Liu, Q.; Li, T.; Sun, X. Durable Electrocatalytic Reduction of Nitrate to Ammonia over Defective Pseudobrookite Fe<sub>2</sub>TiO<sub>5</sub> Nanofibers with Abundant Oxygen Vacancies. *Angew. Chemie* **2023**, *135* (5), e202215782. <https://doi.org/10.1002/ange.202215782>.
- (102) Fan, X.; He, X.; Ji, X.; Zhang, L.; Li, J.; Hu, L.; Li, X.; Sun, S.; Zheng, D.; Luo, Y.; Wang, Y.; Xie, L.; Liu, Q.; Ying, B.; Sun, X. High-Efficiency Electrosynthesis of Ammonia with Selective Reduction of Nitrite over an Ag Nanoparticle-Decorated TiO<sub>2</sub> Nanoribbon Array. *Inorg. Chem. Front.* **2023**, *10* (5), 1431–1435. <https://doi.org/10.1039/d2qi02409h>.
- (103) Wang, H.; Zhang, F.; Jin, M.; Zhao, D.; Fan, X.; Li, Z.; Luo, Y.; Zheng, D.; Li, T.; Wang, Y.; Ying, B.; Sun, S.; Liu, Q.; Liu, X.; Sun, X. V-Doped TiO<sub>2</sub> Nanobelt Array for High-Efficiency Electrocatalytic Nitrite Reduction to Ammonia. *Mater. Today Phys.* **2023**, *30*, 100944. <https://doi.org/10.1016/j.mtphys.2022.100944>.
- (104) Guo, Y.; Zhang, R.; Zhang, S.; Zhao, Y.; Yang, Q.; Huang, Z.; Dong, B.; Zhi, C. Pd Doping-Weakened Intermediate Adsorption to Promote Electrocatalytic Nitrate Reduction on TiO<sub>2</sub> Nanoarrays for Ammonia Production and Energy Supply with Zinc-Nitrate Batteries. *Energy Environ. Sci.* **2021**, *14* (7), 3938–3944. <https://doi.org/10.1039/d1ee00806d>.
- (105) Du, W.; Sun, Z.; Chen, K.; Wang, F.; Chu, K. Nb<sub>1</sub>-Zr Dual Active Sites Constructed on ZrO<sub>2</sub> Boost Nitrite-to-Ammonia Electroreduction. *Chem. Eng. J.* **2024**, *481*, 148733. <https://doi.org/10.1016/j.cej.2024.148733>.
- (106) Du, W.; Zhang, Y.; Chen, K.; Zhang, G.; Chu, K. Mo Single-Atom Catalyst Boosts Nitrite Electroreduction for Ammonia Synthesis. *J. Clean. Prod.* **2023**, *424*, 138875. <https://doi.org/10.1016/j.jclepro.2023.138875>.
- (107) Zhang, Y.; Wan, Y.; Liu, X.; Chen, K.; Chu, K. Nb-Doped NiO Nanoflowers for Nitrite Electroreduction to Ammonia. *iScience* **2023**, *26* (10). <https://doi.org/10.1016/j.isci.2023.107944>.
- (108) Liu, Q.; Wen, G.; Zhao, D.; Xie, L.; Sun, S.; Zhang, L.; Luo, Y.; Ali Alshehri, A.; Hamdy, M. S.; Kong, Q.; Sun, X. Nitrite Reduction over Ag Nanoarray Electrocatalyst for Ammonia Synthesis. *J. Colloid Interface Sci.* **2022**, *623*, 513–519. <https://doi.org/10.1016/j.jcis.2022.04.173>.
